# Supplementary material for: Development of a Novel Endometrial Signature Based on Endometrial microRNA for Determining the Optimal Timing for Embryo Transfer
Source: MDPI journal article supplement (doi:10.3390/biomedicines12030700), 2024-03-21
Supplement: s1 [file s1]

**Supplemental Table S3.** A list of differentially expressed miRNAs

| miRNA           | Fold Change (log2)   |                      |
|-----------------|----------------------|----------------------|
|                 | 120±5hrs vs 108±5hrs | 120±5hrs vs 144±5hrs |
| hsa-miR-182-5p  |                      | -0.6718              |
| hsa-miR-205-5p  |                      | -1.0243              |
| hsa-miR-224-5p  | -1.0524              | 0.6347               |
| hsa-miR-17-3p   |                      | 0.6035               |
| hsa-miR-31-5p   |                      | 0.7222               |
| hsa-miR-382-5p  | 0.759                | 0.834                |
| hsa-miR-593-5p  | 0.9558               | 1.1594               |
| hsa-miR-596     |                      | 0.677                |
| hsa-miR-375-3p  |                      | -1.1105              |
| hsa-miR-146a-5p | -0.7946              |                      |
| hsa-miR-146b-5p | -0.6263              |                      |
| hsa-miR-155-5p  | -0.8652              |                      |
| hsa-miR-20b-5p  | -0.853               |                      |
| hsa-miR-1973    | 1.6413               |                      |
| hsa-miR-299-5p  | -0.694               |                      |
| hsa-miR-29a-5p  | -0.6691              |                      |
| hsa-miR-625-5p  | -0.6064              |                      |
| hsa-miR-95-3p   | -0.8184              |                      |
| hsa-miR-9-5p    | 0.887                |                      |
| hsa-miR-31-3p   | 0.8858               |                      |
| hsa-miR-1248    | 1.2239               |                      |

The differentially expressed miRNAs were selected by the fold change  $\geq \pm 1.5$  with  $p < 0.05$
