# Supplementary material for: Development of a Novel Endometrial Signature Based on Endometrial microRNA for Determining the Optimal Timing for Embryo Transfer
Source: MDPI journal article supplement (doi:10.3390/biomedicines12030700), 2024-03-21
Supplement: s1 [file s1]

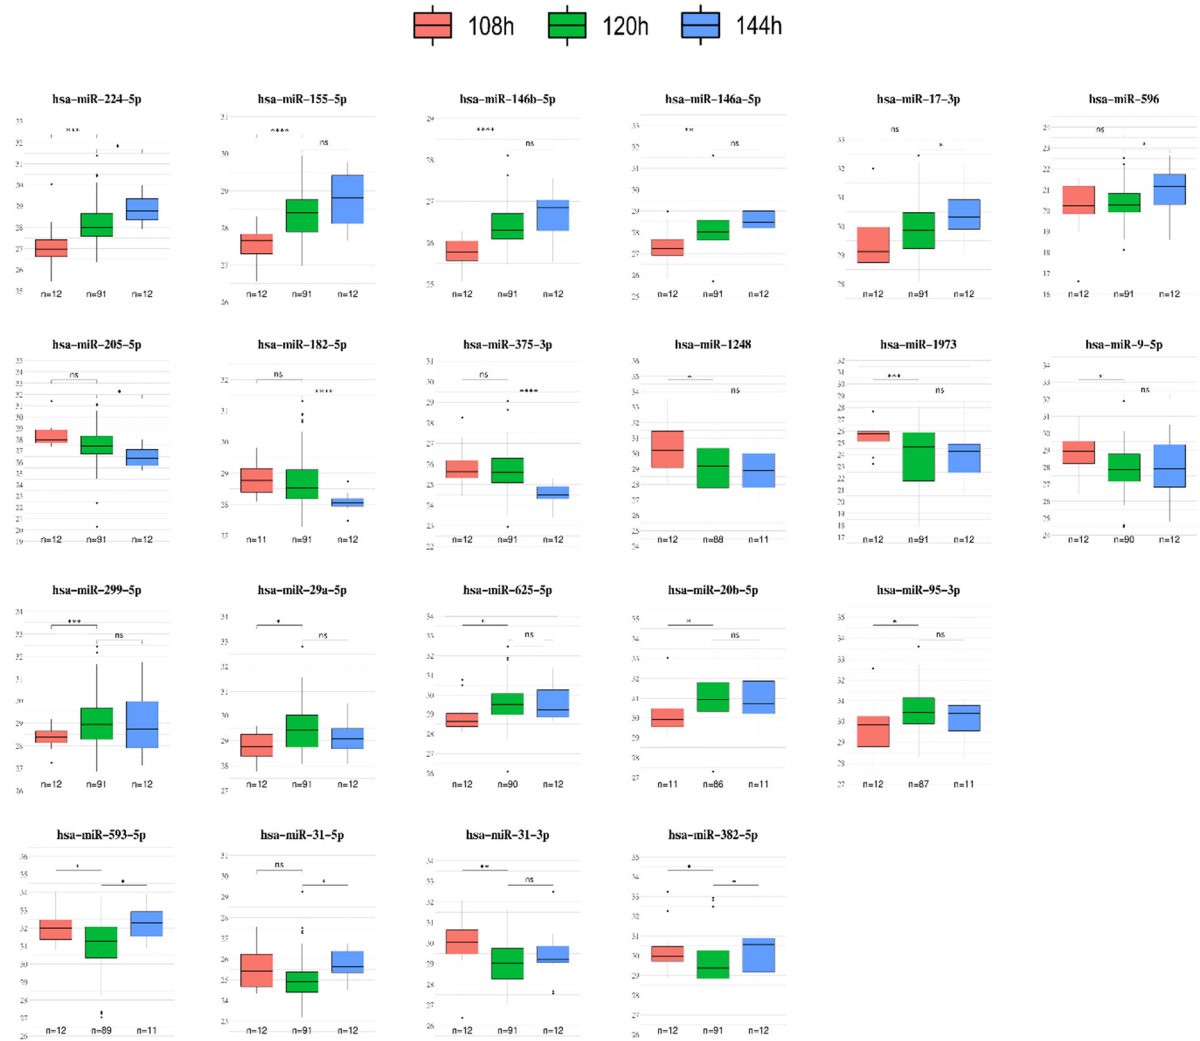

**Figure S2.** The differentially expressed miRNAs. miRNA signatures either for 120±5hrs vs. 108±5hrs or for 120±5hrs vs. 144±5hrs. The differentially expressed miRNAs were selected by the  $\log_2(\text{fold-change}) \geq \pm 0.585$  with  $p < 0.05$ . Y-axis denotes Cq, and X-axis represents the number of cases. Asterisks in statistics: ns denotes  $p > 0.05$ , \* denotes  $p \leq 0.05$ , \*\* denotes  $p \leq 0.01$ , \*\*\* denotes  $p \leq 0.001$ , and \*\*\*\* denotes  $p \leq 0.0001$ .
