# Supplementary material for: Development of a Novel Endometrial Signature Based on Endometrial microRNA for Determining the Optimal Timing for Embryo Transfer
Source: MDPI journal article supplement (doi:10.3390/biomedicines12030700), 2024-03-21
Supplement: s1 [file s1]

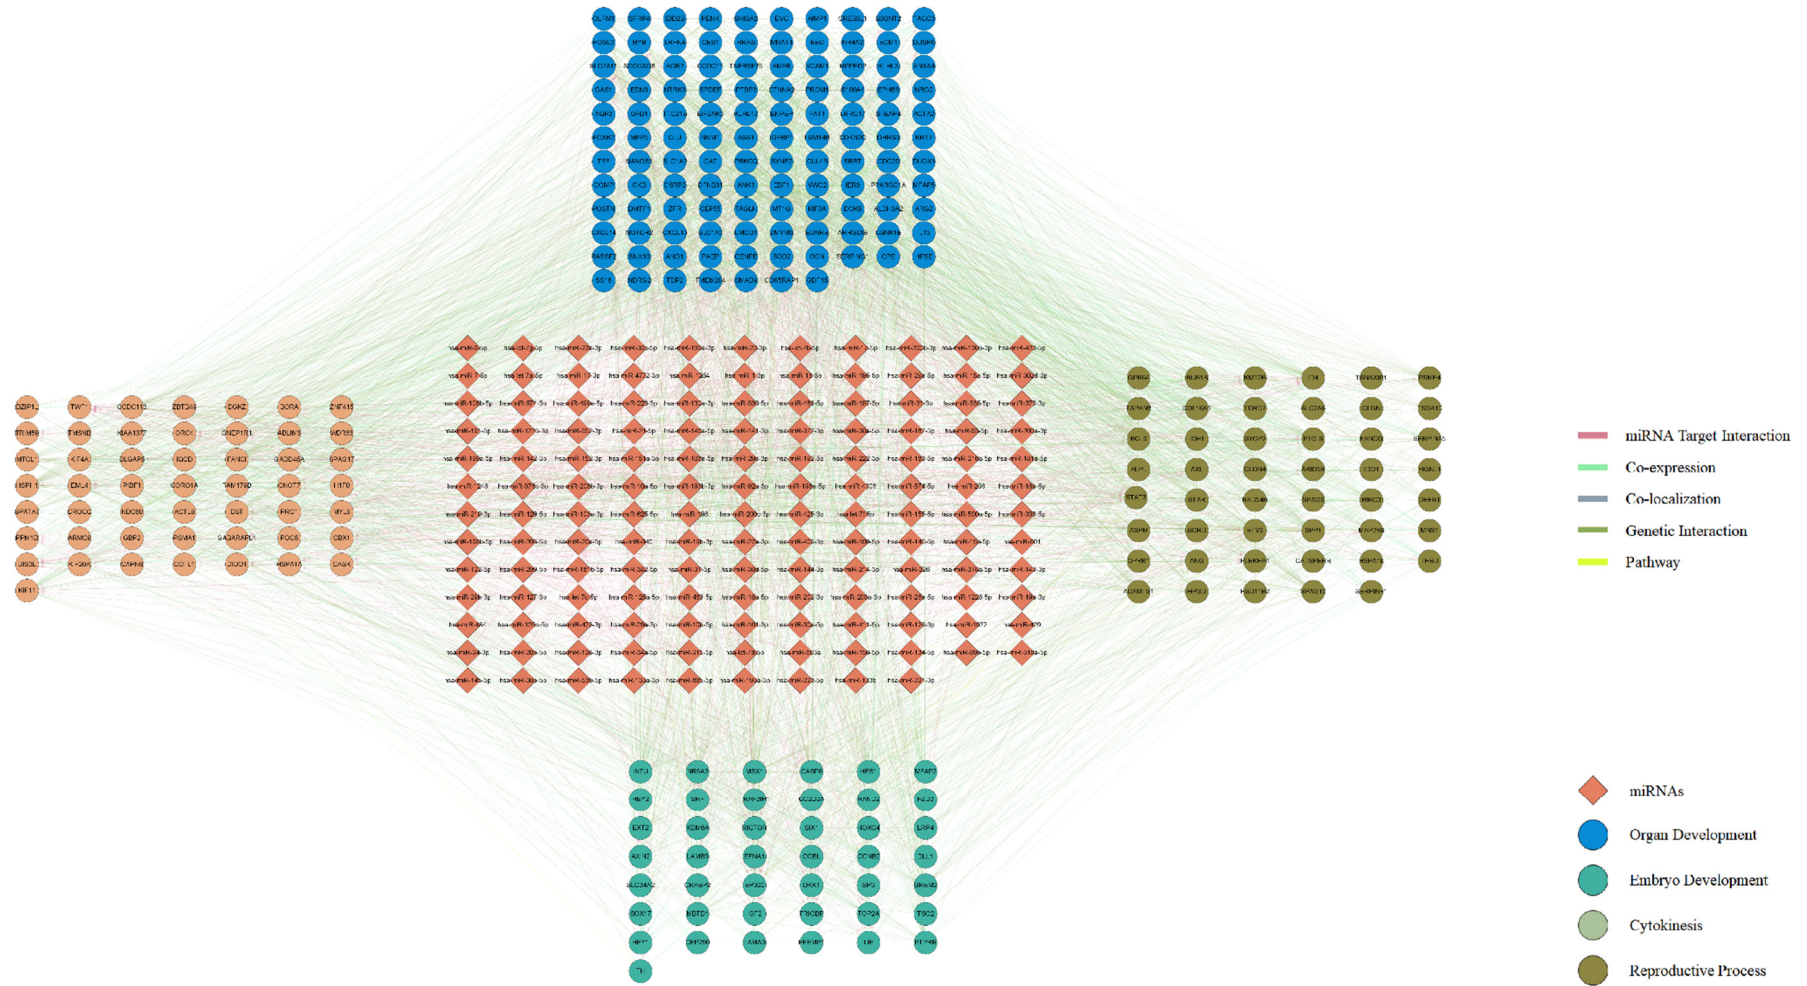

**Figure S1.** miRNA-gene interaction network. The data expressed in tabular form is shown in Supplemental Table S2.
