# Supplementary material for: Development of a Novel Endometrial Signature Based on Endometrial microRNA for Determining the Optimal Timing for Embryo Transfer
Source: MDPI journal article supplement (doi:10.3390/biomedicines12030700), 2024-03-21
Supplement: s1 [file s1]

**Supplemental Table S2.** A list of the reproductive disease-related miRNA-gene interactions

| <b>miRTarBase ID</b> | <b>miRNA</b>    | <b>Target Gene</b> | <b>Function</b>      | <b>References (PMID)</b> |
|----------------------|-----------------|--------------------|----------------------|--------------------------|
| MIRT000071           | hsa-miR-34a-5p  | BIRC3              | Reproductive Process | 17540599                 |
| MIRT000135           | hsa-miR-222-3p  | SOD2               | Development Process  | 19487542                 |
| MIRT000283           | hsa-miR-15a-5p  | MYB                | Development Process  | 18818396                 |
| MIRT000283           | hsa-miR-15a-5p  | MYB                | Development Process  | 21205891                 |
| MIRT000283           | hsa-miR-15a-5p  | MYB                | Development Process  | 28337280                 |
| MIRT000331           | hsa-miR-133a-3p | KRT7               | Development Process  | 19378336                 |
| MIRT000340           | hsa-miR-128-3p  | NTRK3              | Development Process  | 19370765                 |
| MIRT000340           | hsa-miR-128-3p  | NTRK3              | Development Process  | 21143953                 |
| MIRT000365           | hsa-miR-122-5p  | SRF                | Embryo Development   | 19726678                 |
| MIRT000497           | hsa-miR-20b-5p  | STAT3              | Reproductive Process | 20232316                 |
| MIRT000497           | hsa-miR-20b-5p  | STAT3              | Reproductive Process | 22473208                 |
| MIRT000640           | hsa-miR-9-5p    | BCL6               | Reproductive Process | 19956200                 |
| MIRT000720           | hsa-miR-34a-5p  | MYB                | Development Process  | 19584398                 |
| MIRT000720           | hsa-miR-34a-5p  | MYB                | Development Process  | 21566225                 |
| MIRT000720           | hsa-miR-34a-5p  | MYB                | Development Process  | 24504520                 |
| MIRT000866           | hsa-miR-15a-5p  | HSPA1A             | Cytokinesis          | 18362358                 |
| MIRT000935           | hsa-miR-150-5p  | MYB                | Development Process  | 18667440                 |
| MIRT000935           | hsa-miR-150-5p  | MYB                | Development Process  | 18539114                 |
| MIRT000935           | hsa-miR-150-5p  | MYB                | Development Process  | 18814950                 |
| MIRT000935           | hsa-miR-150-5p  | MYB                | Development Process  | 21590770                 |
| MIRT000935           | hsa-miR-150-5p  | MYB                | Development Process  | 20603081                 |
| MIRT000935           | hsa-miR-150-5p  | MYB                | Development Process  | 17923094                 |
| MIRT000935           | hsa-miR-150-5p  | MYB                | Development Process  | 22025269                 |
| MIRT000935           | hsa-miR-150-5p  | MYB                | Development Process  | 23604034                 |
| MIRT000935           | hsa-miR-150-5p  | MYB                | Development Process  | 24613688                 |
| MIRT000935           | hsa-miR-150-5p  | MYB                | Development Process  | 24438945                 |
| MIRT000935           | hsa-miR-150-5p  | MYB                | Development Process  | 24086639                 |
| MIRT000935           | hsa-miR-150-5p  | MYB                | Development Process  | 23521217                 |
| MIRT001037           | hsa-miR-125b-5p | LIF                | Embryo Development   | 19011087                 |
| MIRT001037           | hsa-miR-125b-5p | LIF                | Embryo Development   | 25472924                 |
| MIRT001039           | hsa-miR-26a-5p  | LIF                | Embryo Development   | 19011087                 |
| MIRT001232           | hsa-miR-34a-5p  | AXIN2              | Embryo Development   | 19336450                 |
| MIRT001353           | hsa-miR-1-3p    | NOTCH2             | Development Process  | 18668040                 |
| MIRT001353           | hsa-miR-1-3p    | NOTCH2             | Development Process  | 18668037                 |
| MIRT001437           | hsa-miR-16-5p   | NOTCH2             | Development Process  | 18668040                 |
| MIRT001437           | hsa-miR-16-5p   | NOTCH2             | Development Process  | 22473208                 |
| MIRT001437           | hsa-miR-16-5p   | NOTCH2             | Development Process  | 23824327                 |

|            |                 |          |                      |          |
|------------|-----------------|----------|----------------------|----------|
| MIRT001456 | hsa-miR-16-5p   | HSPA1A   | Cytokinesis          | 18362358 |
| MIRT001456 | hsa-miR-16-5p   | HSPA1A   | Cytokinesis          | 18668040 |
| MIRT001473 | hsa-miR-16-5p   | CDK5RAP1 | Development Process  | 18668040 |
| MIRT001498 | hsa-miR-155-5p  | SYNE2    | Development Process  | 18668040 |
| MIRT001556 | hsa-miR-155-5p  | CUL4B    | Development Process  | 18668040 |
| MIRT001757 | hsa-miR-34a-5p  | DLL1     | Embryo Development   | 14697198 |
| MIRT001757 | hsa-miR-34a-5p  | DLL1     | Embryo Development   | 19461653 |
| MIRT001757 | hsa-miR-34a-5p  | DLL1     | Embryo Development   | 20144220 |
| MIRT001757 | hsa-miR-34a-5p  | DLL1     | Embryo Development   | 23327670 |
| MIRT001843 | hsa-miR-1-3p    | HAND2    | Embryo Development   | 21169019 |
| MIRT001843 | hsa-miR-1-3p    | HAND2    | Embryo Development   | 15951802 |
| MIRT002402 | hsa-miR-27a-3p  | SP3      | Embryo Development   | 18006846 |
| MIRT002402 | hsa-miR-27a-3p  | SP3      | Embryo Development   | 20382698 |
| MIRT002532 | hsa-miR-373-3p  | PRC1     | Cytokinesis          | 15685193 |
| MIRT002758 | hsa-miR-1-3p    | AXL      | Reproductive Process | 15685193 |
| MIRT002758 | hsa-miR-1-3p    | AXL      | Reproductive Process | 18668040 |
| MIRT002765 | hsa-miR-1-3p    | EML4     | Cytokinesis          | 15685193 |
| MIRT002946 | hsa-miR-15a-5p  | DMTF1    | Development Process  | 15131085 |
| MIRT002946 | hsa-miR-15a-5p  | DMTF1    | Development Process  | 22473208 |
| MIRT002946 | hsa-miR-15a-5p  | DMTF1    | Development Process  | 21572407 |
| MIRT002953 | hsa-miR-23a-3p  | HES1     | Embryo Development   | 12808467 |
| MIRT002953 | hsa-miR-23a-3p  | HES1     | Embryo Development   | 15066185 |
| MIRT003108 | hsa-miR-122-5p  | SLC7A11  | Development Process  | 19296470 |
| MIRT003170 | hsa-miR-210-3p  | CBX1     | Cytokinesis          | 19826008 |
| MIRT003323 | hsa-miR-9-5p    | NTRK3    | Development Process  | 17483472 |
| MIRT003323 | hsa-miR-9-5p    | NTRK3    | Development Process  | 19188439 |
| MIRT003323 | hsa-miR-9-5p    | NTRK3    | Development Process  | 18973228 |
| MIRT003324 | hsa-miR-199a-3p | KRT7     | Development Process  | 19378336 |
| MIRT003536 | hsa-miR-19a-3p  | NR4A2    | Development Process  | 19885849 |
| MIRT003537 | hsa-miR-302d-3p | NR4A2    | Development Process  | 19885849 |
| MIRT003538 | hsa-miR-372-3p  | NR4A2    | Development Process  | 19885849 |
| MIRT003598 | hsa-miR-200c-3p | EP300    | Embryo Development   | 19569050 |
| MIRT003599 | hsa-miR-200b-3p | EP300    | Embryo Development   | 19569050 |
| MIRT003600 | hsa-miR-429     | EP300    | Embryo Development   | 19569050 |
| MIRT003601 | hsa-miR-182-5p  | EP300    | Embryo Development   | 19569050 |
| MIRT003609 | hsa-miR-29a-3p  | DKK1     | Embryo Development   | 20551325 |
| MIRT003754 | hsa-miR-125b-5p | NTRK3    | Development Process  | 17483472 |
| MIRT003755 | hsa-miR-125a-5p | NTRK3    | Development Process  | 17483472 |
| MIRT003755 | hsa-miR-125a-5p | NTRK3    | Development Process  | 19179615 |
| MIRT003755 | hsa-miR-125a-5p | NTRK3    | Development Process  | 18973228 |

|            |                 |         |                      |          |
|------------|-----------------|---------|----------------------|----------|
| MIRT004007 | hsa-miR-200a-3p | VCAM1   | Development Process  | 17875710 |
| MIRT004044 | hsa-miR-29a-3p  | PPM1D   | Cytokinesis          | 21175813 |
| MIRT004050 | hsa-miR-129-5p  | ETV6    | Reproductive Process | 19487295 |
| MIRT004081 | hsa-miR-126-3p  | VCAM1   | Development Process  | 18227515 |
| MIRT004086 | hsa-miR-101-3p  | EED     | Development Process  | 19008416 |
| MIRT004183 | hsa-miR-197-3p  | AGR2    | Development Process  | 16822819 |
| MIRT004194 | hsa-miR-197-3p  | LRP4    | Embryo Development   | 16822819 |
| MIRT004194 | hsa-miR-197-3p  | LRP4    | Embryo Development   | 23622248 |
| MIRT004200 | hsa-miR-197-3p  | IER3    | Development Process  | 16822819 |
| MIRT004206 | hsa-miR-197-3p  | CES1    | Development Process  | 16822819 |
| MIRT004325 | hsa-miR-199a-5p | LIF     | Embryo Development   | 19011087 |
| MIRT004325 | hsa-miR-199a-5p | LIF     | Embryo Development   | 19536157 |
| MIRT004326 | hsa-miR-125a-5p | LIF     | Embryo Development   | 19011087 |
| MIRT004425 | hsa-miR-326     | NOTCH2  | Development Process  | 19955368 |
| MIRT004463 | hsa-miR-127-3p  | BCL6    | Reproductive Process | 17581274 |
| MIRT004463 | hsa-miR-127-3p  | BCL6    | Reproductive Process | 16766263 |
| MIRT004463 | hsa-miR-127-3p  | BCL6    | Reproductive Process | 24282530 |
| MIRT004520 | hsa-let-7a-5p   | IGF2    | Embryo Development   | 17974952 |
| MIRT004565 | hsa-miR-299-5p  | SPP1    | Reproductive Process | 19538464 |
| MIRT004637 | hsa-miR-16-5p   | MYB     | Development Process  | 21205891 |
| MIRT004911 | hsa-miR-198     | NTRK3   | Development Process  | 19370765 |
| MIRT004914 | hsa-miR-625-5p  | NTRK3   | Development Process  | 19370765 |
| MIRT004936 | hsa-miR-125b-5p | KRT7    | Development Process  | 19378336 |
| MIRT004937 | hsa-miR-195-5p  | KRT7    | Development Process  | 19378336 |
| MIRT004938 | hsa-miR-145-5p  | KRT7    | Development Process  | 19378336 |
| MIRT004984 | hsa-miR-31-5p   | FZD3    | Embryo Development   | 19524507 |
| MIRT005006 | hsa-miR-125b-5p | STAT3   | Reproductive Process | 17891175 |
| MIRT005006 | hsa-miR-125b-5p | STAT3   | Reproductive Process | 28108732 |
| MIRT005006 | hsa-miR-125b-5p | STAT3   | Reproductive Process | 27576314 |
| MIRT005029 | hsa-miR-34a-5p  | NOTCH2  | Development Process  | 19773441 |
| MIRT005029 | hsa-miR-34a-5p  | NOTCH2  | Development Process  | 22363487 |
| MIRT005089 | hsa-miR-1-3p    | TWF1    | Cytokinesis          | 15685193 |
| MIRT005089 | hsa-miR-1-3p    | TWF1    | Cytokinesis          | 18668040 |
| MIRT005089 | hsa-miR-1-3p    | TWF1    | Cytokinesis          | 20571053 |
| MIRT005125 | hsa-miR-30a-5p  | IDH1    | Reproductive Process | 18668040 |
| MIRT005145 | hsa-miR-30a-5p  | SLC7A11 | Development Process  | 18668040 |
| MIRT005164 | hsa-miR-30a-5p  | TWF1    | Cytokinesis          | 18668040 |
| MIRT005164 | hsa-miR-30a-5p  | TWF1    | Cytokinesis          | 22473208 |
| MIRT005246 | hsa-miR-155-5p  | TWF1    | Cytokinesis          | 18668040 |
| MIRT005246 | hsa-miR-155-5p  | TWF1    | Cytokinesis          | 20584899 |

|            |                 |          |                      |          |
|------------|-----------------|----------|----------------------|----------|
| MIRT005246 | hsa-miR-155-5p  | TWF1     | Cytokinesis          | 22815788 |
| MIRT005293 | hsa-let-7a-5p   | CASP8    | Embryo Development   | 18758960 |
| MIRT005360 | hsa-miR-16-5p   | PPM1D    | Cytokinesis          | 20668064 |
| MIRT005538 | hsa-miR-126-3p  | TWF1     | Cytokinesis          | 20571053 |
| MIRT005683 | hsa-miR-145-5p  | PPM1D    | Cytokinesis          | 20668064 |
| MIRT005684 | hsa-miR-203a-3p | PPM1D    | Cytokinesis          | 20668064 |
| MIRT005738 | hsa-miR-125b-5p | IGF2     | Embryo Development   | 21200031 |
| MIRT005739 | hsa-miR-150-5p  | IGF2     | Embryo Development   | 21200031 |
| MIRT005745 | hsa-miR-17-3p   | SOD2     | Development Process  | 21203553 |
| MIRT005745 | hsa-miR-17-3p   | SOD2     | Development Process  | 27505139 |
| MIRT005787 | hsa-miR-221-3p  | CORO1A   | Cytokinesis          | 21226887 |
| MIRT005791 | hsa-miR-222-3p  | CORO1A   | Cytokinesis          | 21226887 |
| MIRT005874 | hsa-miR-31-5p   | DKK1     | Embryo Development   | 21048943 |
| MIRT005884 | hsa-miR-155-5p  | MYB      | Development Process  | 21062812 |
| MIRT005884 | hsa-miR-155-5p  | MYB      | Development Process  | 20680360 |
| MIRT005884 | hsa-miR-155-5p  | MYB      | Development Process  | 23807165 |
| MIRT005962 | hsa-miR-151a-3p | NTRK3    | Development Process  | 21143953 |
| MIRT006153 | hsa-miR-483-5p  | SRF      | Embryo Development   | 21893058 |
| MIRT006248 | hsa-miR-223-3p  | LIF      | Embryo Development   | 22080513 |
| MIRT006249 | hsa-miR-223-3p  | SP3      | Embryo Development   | 22080513 |
| MIRT006280 | hsa-miR-23a-3p  | PPARGC1A | Development Process  | 22318941 |
| MIRT006324 | hsa-miR-30b-5p  | BCL6     | Reproductive Process | 22387553 |
| MIRT006386 | hsa-miR-29c-3p  | IGFBP1   | Development Process  | 21436257 |
| MIRT006481 | hsa-miR-181a-5p | DUSP6    | Development Process  | 17382377 |
| MIRT006481 | hsa-miR-181a-5p | DUSP6    | Development Process  | 25477247 |
| MIRT006649 | hsa-miR-409-3p  | ANG      | Reproductive Process | 22531314 |
| MIRT006664 | hsa-miR-34a-5p  | AXL      | Reproductive Process | 21814748 |
| MIRT006664 | hsa-miR-34a-5p  | AXL      | Reproductive Process | 21566225 |
| MIRT006664 | hsa-miR-34a-5p  | AXL      | Reproductive Process | 26667302 |
| MIRT006664 | hsa-miR-34a-5p  | AXL      | Reproductive Process | 26287733 |
| MIRT006750 | hsa-miR-15b-5p  | AXIN2    | Embryo Development   | 21501592 |
| MIRT006750 | hsa-miR-15b-5p  | AXIN2    | Embryo Development   | 23446348 |
| MIRT006750 | hsa-miR-15b-5p  | AXIN2    | Embryo Development   | 21572407 |
| MIRT006750 | hsa-miR-15b-5p  | AXIN2    | Embryo Development   | 20371350 |
| MIRT006751 | hsa-miR-16-5p   | AXIN2    | Embryo Development   | 21501592 |
| MIRT006751 | hsa-miR-16-5p   | AXIN2    | Embryo Development   | 20371350 |
| MIRT006751 | hsa-miR-16-5p   | AXIN2    | Embryo Development   | 23446348 |
| MIRT006751 | hsa-miR-16-5p   | AXIN2    | Embryo Development   | 21572407 |
| MIRT006833 | hsa-miR-9-5p    | SRF      | Embryo Development   | 22907787 |
| MIRT006834 | hsa-miR-200a-3p | SRF      | Embryo Development   | 22907787 |

|            |                 |          |                      |          |
|------------|-----------------|----------|----------------------|----------|
| MIRT006898 | hsa-miR-23a-3p  | FANCG    | Reproductive Process | 21750350 |
| MIRT006927 | hsa-miR-155-5p  | BCL6     | Reproductive Process | 23041630 |
| MIRT006927 | hsa-miR-155-5p  | BCL6     | Reproductive Process | 26986233 |
| MIRT007067 | hsa-miR-30b-5p  | CAT      | Development Process  | 22880027 |
| MIRT007087 | hsa-miR-150-5p  | EP300    | Embryo Development   | 23211718 |
| MIRT007087 | hsa-miR-150-5p  | EP300    | Embryo Development   | 27285761 |
| MIRT007203 | hsa-miR-30c-5p  | TWF1     | Cytokinesis          | 23224145 |
| MIRT007203 | hsa-miR-30c-5p  | TWF1     | Cytokinesis          | 22473208 |
| MIRT016274 | hsa-miR-193b-3p | SYNE2    | Development Process  | 20304954 |
| MIRT016311 | hsa-miR-193b-3p | FANCI    | Cytokinesis          | 20304954 |
| MIRT016353 | hsa-miR-193b-3p | NDC80    | Cytokinesis          | 20304954 |
| MIRT016365 | hsa-miR-193b-3p | TMEM204  | Development Process  | 20304954 |
| MIRT016382 | hsa-miR-193b-3p | KIF11    | Cytokinesis          | 20304954 |
| MIRT016385 | hsa-miR-193b-3p | CDC20    | Development Process  | 20304954 |
| MIRT016386 | hsa-miR-193b-3p | BUB1B    | Reproductive Process | 20304954 |
| MIRT016386 | hsa-miR-193b-3p | BUB1B    | Reproductive Process | 23622248 |
| MIRT016405 | hsa-miR-193b-3p | FANCG    | Reproductive Process | 20304954 |
| MIRT016461 | hsa-miR-193b-3p | SIX1     | Embryo Development   | 20304954 |
| MIRT016473 | hsa-miR-193b-3p | TOP2A    | Embryo Development   | 20304954 |
| MIRT016475 | hsa-miR-193b-3p | CBX1     | Cytokinesis          | 20304954 |
| MIRT016478 | hsa-miR-193b-3p | ASPM     | Reproductive Process | 20304954 |
| MIRT016532 | hsa-miR-193b-3p | BORA     | Cytokinesis          | 20304954 |
| MIRT016551 | hsa-miR-193b-3p | COTL1    | Cytokinesis          | 21512034 |
| MIRT016566 | hsa-miR-193b-3p | TACC3    | Development Process  | 20304954 |
| MIRT016566 | hsa-miR-193b-3p | TACC3    | Development Process  | 23622248 |
| MIRT016588 | hsa-miR-193b-3p | MYB      | Development Process  | 20304954 |
| MIRT016588 | hsa-miR-193b-3p | MYB      | Development Process  | 25231743 |
| MIRT016642 | hsa-miR-429     | RASSF2   | Development Process  | 20005803 |
| MIRT016724 | hsa-miR-335-5p  | EFNA1    | Embryo Development   | 18185580 |
| MIRT016866 | hsa-miR-335-5p  | SPP1     | Reproductive Process | 18185580 |
| MIRT016961 | hsa-miR-335-5p  | HSPA1L   | Reproductive Process | 18185580 |
| MIRT017025 | hsa-miR-335-5p  | SDCCAG8  | Development Process  | 18185580 |
| MIRT017044 | hsa-miR-335-5p  | THBD     | Reproductive Process | 18185580 |
| MIRT017049 | hsa-miR-335-5p  | HEY1     | Embryo Development   | 18185580 |
| MIRT017134 | hsa-miR-335-5p  | DHRS3    | Development Process  | 18185580 |
| MIRT017152 | hsa-miR-335-5p  | MPPED2   | Development Process  | 18185580 |
| MIRT017160 | hsa-miR-335-5p  | SLC34A2  | Embryo Development   | 18185580 |
| MIRT017173 | hsa-miR-335-5p  | PLEKHA1  | Reproductive Process | 18185580 |
| MIRT017228 | hsa-miR-335-5p  | SERPINF1 | Reproductive Process | 18185580 |
| MIRT017345 | hsa-miR-335-5p  | PPARGC1A | Development Process  | 18185580 |

|            |                 |           |                      |          |
|------------|-----------------|-----------|----------------------|----------|
| MIRT017395 | hsa-miR-335-5p  | CLDN4     | Reproductive Process | 18185580 |
| MIRT017492 | hsa-miR-335-5p  | BCL6      | Reproductive Process | 18185580 |
| MIRT017645 | hsa-miR-335-5p  | IDH1      | Reproductive Process | 18185580 |
| MIRT017763 | hsa-miR-335-5p  | GABARAPL1 | Cytokinesis          | 18185580 |
| MIRT017798 | hsa-miR-335-5p  | GBP2      | Cytokinesis          | 18185580 |
| MIRT017844 | hsa-miR-335-5p  | DLL1      | Embryo Development   | 18185580 |
| MIRT017915 | hsa-miR-335-5p  | LRRC17    | Development Process  | 18185580 |
| MIRT017965 | hsa-miR-335-5p  | CATSPERB  | Reproductive Process | 18185580 |
| MIRT018057 | hsa-miR-335-5p  | LIF       | Embryo Development   | 18185580 |
| MIRT018126 | hsa-miR-335-5p  | LMOD1     | Development Process  | 18185580 |
| MIRT018150 | hsa-miR-335-5p  | HSPA1A    | Cytokinesis          | 18185580 |
| MIRT018260 | hsa-miR-335-5p  | RICTOR    | Embryo Development   | 18185580 |
| MIRT018344 | hsa-miR-335-5p  | ANG       | Reproductive Process | 18185580 |
| MIRT018347 | hsa-miR-335-5p  | DST       | Cytokinesis          | 18185580 |
| MIRT018401 | hsa-miR-335-5p  | AGR2      | Development Process  | 18185580 |
| MIRT018424 | hsa-miR-335-5p  | EVC       | Development Process  | 18185580 |
| MIRT018452 | hsa-miR-335-5p  | ID4       | Reproductive Process | 21618216 |
| MIRT018452 | hsa-miR-335-5p  | ID4       | Reproductive Process | 20371350 |
| MIRT018465 | hsa-miR-335-5p  | NR4A2     | Development Process  | 18185580 |
| MIRT018614 | hsa-miR-335-5p  | ANO1      | Development Process  | 18185580 |
| MIRT018619 | hsa-miR-335-5p  | EBF1      | Development Process  | 18185580 |
| MIRT018633 | hsa-miR-335-5p  | DUSP6     | Development Process  | 18185580 |
| MIRT018687 | hsa-miR-335-5p  | KLHL17    | Development Process  | 18185580 |
| MIRT018698 | hsa-miR-335-5p  | SPDEF     | Development Process  | 18185580 |
| MIRT018703 | hsa-miR-335-5p  | GDF15     | Development Process  | 18185580 |
| MIRT018847 | hsa-miR-335-5p  | SERPING1  | Development Process  | 18185580 |
| MIRT018916 | hsa-miR-335-5p  | CPE       | Development Process  | 18185580 |
| MIRT018982 | hsa-miR-335-5p  | WHRN      | Development Process  | 18185580 |
| MIRT019050 | hsa-miR-335-5p  | EIF2AK3   | Development Process  | 18185580 |
| MIRT019514 | hsa-miR-151a-3p | MBTD1     | Embryo Development   | 20371350 |
| MIRT020112 | hsa-miR-130b-3p | GAS1      | Development Process  | 20371350 |
| MIRT020290 | hsa-miR-130b-3p | MPP5      | Development Process  | 20371350 |
| MIRT020309 | hsa-miR-130b-3p | TRIM59    | Cytokinesis          | 20371350 |
| MIRT020352 | hsa-miR-200a-3p | RASSF2    | Development Process  | 20005803 |
| MIRT020420 | hsa-miR-106b-5p | OPRK1     | Reproductive Process | 17242205 |
| MIRT020446 | hsa-miR-106b-5p | SMAD9     | Development Process  | 17242205 |
| MIRT020611 | hsa-miR-155-5p  | CEP55     | Development Process  | 18668040 |
| MIRT020704 | hsa-miR-155-5p  | AIMP1     | Development Process  | 18668040 |
| MIRT020726 | hsa-miR-155-5p  | AXL       | Reproductive Process | 18668040 |
| MIRT020789 | hsa-miR-155-5p  | GABARAPL1 | Cytokinesis          | 20584899 |

|            |                 |         |                      |          |
|------------|-----------------|---------|----------------------|----------|
| MIRT020841 | hsa-miR-155-5p  | RICTOR  | Embryo Development   | 18668040 |
| MIRT020854 | hsa-miR-155-5p  | MPP5    | Development Process  | 20584899 |
| MIRT020854 | hsa-miR-155-5p  | MPP5    | Development Process  | 22473208 |
| MIRT020866 | hsa-miR-155-5p  | CAT     | Development Process  | 18668040 |
| MIRT020879 | hsa-miR-155-5p  | NOTCH2  | Development Process  | 18668040 |
| MIRT020896 | hsa-miR-155-5p  | SLC7A11 | Development Process  | 18668040 |
| MIRT020902 | hsa-miR-155-5p  | PSME4   | Reproductive Process | 18668040 |
| MIRT020917 | hsa-miR-155-5p  | VCAM1   | Development Process  | 21310411 |
| MIRT020947 | hsa-miR-155-5p  | ALDH3A2 | Development Process  | 18668040 |
| MIRT021003 | hsa-miR-155-5p  | STAT3   | Reproductive Process | 18668040 |
| MIRT021074 | hsa-miR-200c-3p | RASSF2  | Development Process  | 20005803 |
| MIRT021209 | hsa-miR-150-5p  | PTPRR   | Embryo Development   | 20218812 |
| MIRT021244 | hsa-miR-146a-5p | HSPA1A  | Cytokinesis          | 18057241 |
| MIRT021279 | hsa-miR-146a-5p | SPP1    | Reproductive Process | 20110513 |
| MIRT021293 | hsa-miR-125a-5p | HOXC4   | Embryo Development   | 20371350 |
| MIRT021322 | hsa-miR-9-5p    | EFNA1   | Embryo Development   | 17612493 |
| MIRT021346 | hsa-miR-9-5p    | EP300   | Embryo Development   | 17612493 |
| MIRT021366 | hsa-miR-9-5p    | SYNE2   | Development Process  | 17612493 |
| MIRT021406 | hsa-miR-9-5p    | TAGLN   | Development Process  | 17612493 |
| MIRT021484 | hsa-miR-9-5p    | ID4     | Reproductive Process | 20371350 |
| MIRT021510 | hsa-miR-145-5p  | NDRG2   | Development Process  | 21351259 |
| MIRT021513 | hsa-miR-145-5p  | MAP2K6  | Reproductive Process | 21351259 |
| MIRT021645 | hsa-miR-142-3p  | PROM1   | Development Process  | 21394831 |
| MIRT021645 | hsa-miR-142-3p  | PROM1   | Development Process  | 23619912 |
| MIRT021654 | hsa-miR-141-3p  | RASSF2  | Development Process  | 20005803 |
| MIRT022008 | hsa-miR-128-3p  | MBTD1   | Embryo Development   | 20371350 |
| MIRT022013 | hsa-miR-128-3p  | ARID5B  | Reproductive Process | 20371350 |
| MIRT022018 | hsa-miR-128-3p  | TAGLN   | Development Process  | 17612493 |
| MIRT022041 | hsa-miR-128-3p  | HEY2    | Embryo Development   | 17612493 |
| MIRT022074 | hsa-miR-128-3p  | SLC7A11 | Development Process  | 17612493 |
| MIRT023219 | hsa-miR-122-5p  | DZIP1L  | Cytokinesis          | 19296470 |
| MIRT023397 | hsa-miR-122-5p  | FOXK2   | Development Process  | 17612493 |
| MIRT023397 | hsa-miR-122-5p  | FOXK2   | Development Process  | 23592263 |
| MIRT023446 | hsa-miR-30b-5p  | EML4    | Cytokinesis          | 20371350 |
| MIRT023446 | hsa-miR-30b-5p  | EML4    | Cytokinesis          | 23592263 |
| MIRT023446 | hsa-miR-30b-5p  | EML4    | Cytokinesis          | 21572407 |
| MIRT023489 | hsa-miR-1-3p    | CUL4B   | Development Process  | 18668040 |
| MIRT023499 | hsa-miR-1-3p    | B3GNT2  | Development Process  | 18668037 |
| MIRT023519 | hsa-miR-1-3p    | FANCI   | Cytokinesis          | 18668040 |
| MIRT023547 | hsa-miR-1-3p    | SRF     | Embryo Development   | 20458751 |

|            |                 |         |                      |          |
|------------|-----------------|---------|----------------------|----------|
| MIRT023596 | hsa-miR-1-3p    | SYNE2   | Development Process  | 18668040 |
| MIRT023613 | hsa-miR-1-3p    | DKK1    | Embryo Development   | 18668037 |
| MIRT023657 | hsa-miR-1-3p    | KLHL3   | Development Process  | 18668037 |
| MIRT023720 | hsa-miR-1-3p    | NR5A2   | Embryo Development   | 18668037 |
| MIRT023783 | hsa-miR-1-3p    | IQCD    | Cytokinesis          | 18668037 |
| MIRT023793 | hsa-miR-1-3p    | KIF4A   | Cytokinesis          | 18668040 |
| MIRT024011 | hsa-miR-1-3p    | COTL1   | Cytokinesis          | 18668037 |
| MIRT024131 | hsa-miR-200b-3p | RASSF2  | Development Process  | 20005803 |
| MIRT024160 | hsa-miR-221-3p  | PTBP3   | Development Process  | 20371350 |
| MIRT024160 | hsa-miR-221-3p  | PTBP3   | Development Process  | 21572407 |
| MIRT024274 | hsa-miR-215-5p  | RAD54B  | Reproductive Process | 19074876 |
| MIRT024294 | hsa-miR-215-5p  | THBD    | Reproductive Process | 19074876 |
| MIRT024295 | hsa-miR-215-5p  | DIS3L   | Cytokinesis          | 19074876 |
| MIRT024324 | hsa-miR-215-5p  | CNEP1R1 | Cytokinesis          | 19074876 |
| MIRT024343 | hsa-miR-215-5p  | SS18    | Development Process  | 19074876 |
| MIRT024370 | hsa-miR-215-5p  | SLC7A11 | Development Process  | 19074876 |
| MIRT024373 | hsa-miR-215-5p  | TRIM59  | Cytokinesis          | 19074876 |
| MIRT024449 | hsa-miR-215-5p  | MYB     | Development Process  | 19074876 |
| MIRT024490 | hsa-miR-215-5p  | CENPE   | Development Process  | 19074876 |
| MIRT024587 | hsa-miR-215-5p  | SNX10   | Development Process  | 19074876 |
| MIRT024609 | hsa-miR-215-5p  | BUB1B   | Reproductive Process | 19074876 |
| MIRT024617 | hsa-miR-215-5p  | ANG     | Reproductive Process | 19074876 |
| MIRT024643 | hsa-miR-215-5p  | CDC20   | Development Process  | 19074876 |
| MIRT024665 | hsa-miR-215-5p  | DST     | Cytokinesis          | 19074876 |
| MIRT024686 | hsa-miR-215-5p  | ASPM    | Reproductive Process | 19074876 |
| MIRT024697 | hsa-miR-215-5p  | LSM14B  | Development Process  | 19074876 |
| MIRT024718 | hsa-miR-215-5p  | KIF20A  | Cytokinesis          | 19074876 |
| MIRT024771 | hsa-miR-215-5p  | BORA    | Cytokinesis          | 19074876 |
| MIRT024792 | hsa-miR-215-5p  | DLGAP5  | Cytokinesis          | 19074876 |
| MIRT024828 | hsa-miR-215-5p  | CEP55   | Development Process  | 19074876 |
| MIRT024874 | hsa-miR-215-5p  | EIF2AK3 | Development Process  | 19074876 |
| MIRT024918 | hsa-miR-215-5p  | IL15    | Development Process  | 19074876 |
| MIRT024920 | hsa-miR-215-5p  | MNS1    | Reproductive Process | 19074876 |
| MIRT025001 | hsa-miR-183-5p  | GAS1    | Development Process  | 20371350 |
| MIRT025026 | hsa-miR-183-5p  | NOTCH2  | Development Process  | 20371350 |
| MIRT025026 | hsa-miR-183-5p  | NOTCH2  | Development Process  | 23824327 |
| MIRT025039 | hsa-miR-181a-5p | LRRC17  | Development Process  | 17612493 |
| MIRT025115 | hsa-miR-181a-5p | H1F0    | Cytokinesis          | 20371350 |
| MIRT025115 | hsa-miR-181a-5p | H1F0    | Cytokinesis          | 26701625 |
| MIRT025160 | hsa-miR-181a-5p | HEY2    | Embryo Development   | 17612493 |



|            |                 |         |                      |          |
|------------|-----------------|---------|----------------------|----------|
| MIRT025179 | hsa-miR-181a-5p | SLC7A11 | Development Process  | 17612493 |
| MIRT025208 | hsa-miR-181a-5p | NOTCH2  | Development Process  | 20371350 |
| MIRT025208 | hsa-miR-181a-5p | NOTCH2  | Development Process  | 22942087 |
| MIRT025210 | hsa-miR-34a-5p  | KIF4A   | Cytokinesis          | 21566225 |
| MIRT025257 | hsa-miR-34a-5p  | GAS1    | Development Process  | 20371350 |
| MIRT025257 | hsa-miR-34a-5p  | GAS1    | Development Process  | 23446348 |
| MIRT025257 | hsa-miR-34a-5p  | GAS1    | Development Process  | 21572407 |
| MIRT025257 | hsa-miR-34a-5p  | GAS1    | Development Process  | 24220341 |
| MIRT025259 | hsa-miR-34a-5p  | RRAS    | Development Process  | 20371350 |
| MIRT025264 | hsa-miR-34a-5p  | SYNE2   | Development Process  | 21566225 |
| MIRT025295 | hsa-miR-34a-5p  | KIF11   | Cytokinesis          | 21566225 |
| MIRT025302 | hsa-miR-34a-5p  | HSPA1A  | Cytokinesis          | 21566225 |
| MIRT025331 | hsa-miR-34a-5p  | ANXA4   | Development Process  | 21566225 |
| MIRT025344 | hsa-miR-34a-5p  | ZFR     | Development Process  | 21566225 |
| MIRT025414 | hsa-miR-34a-5p  | CDC20   | Development Process  | 21566225 |
| MIRT025414 | hsa-miR-34a-5p  | CDC20   | Development Process  | 23622248 |
| MIRT025585 | hsa-miR-34a-5p  | CDKN2C  | Development Process  | 21128241 |
| MIRT025743 | hsa-miR-7-5p    | KRT7    | Development Process  | 19073608 |
| MIRT025870 | hsa-miR-7-5p    | MPP5    | Development Process  | 20371350 |
| MIRT025891 | hsa-miR-7-5p    | TAGLN   | Development Process  | 17612493 |
| MIRT025933 | hsa-miR-7-5p    | ALDH3A2 | Development Process  | 19073608 |
| MIRT026025 | hsa-miR-198     | MYB     | Development Process  | 18667440 |
| MIRT026028 | hsa-miR-196a-5p | SRRT    | Development Process  | 20371350 |
| MIRT026028 | hsa-miR-196a-5p | SRRT    | Development Process  | 23622248 |
| MIRT026028 | hsa-miR-196a-5p | SRRT    | Development Process  | 24398324 |
| MIRT026028 | hsa-miR-196a-5p | SRRT    | Development Process  | 23446348 |
| MIRT026028 | hsa-miR-196a-5p | SRRT    | Development Process  | 21572407 |
| MIRT026117 | hsa-miR-192-5p  | FANCI   | Cytokinesis          | 19074876 |
| MIRT026159 | hsa-miR-192-5p  | THBD    | Reproductive Process | 19074876 |
| MIRT026201 | hsa-miR-192-5p  | LSM14B  | Development Process  | 19074876 |
| MIRT026236 | hsa-miR-192-5p  | CENPE   | Development Process  | 19074876 |
| MIRT026262 | hsa-miR-192-5p  | CNEP1R1 | Cytokinesis          | 19074876 |
| MIRT026277 | hsa-miR-192-5p  | CEP55   | Development Process  | 19074876 |
| MIRT026319 | hsa-miR-192-5p  | CDC20   | Development Process  | 19074876 |
| MIRT026320 | hsa-miR-192-5p  | BUB1B   | Reproductive Process | 19074876 |
| MIRT026419 | hsa-miR-192-5p  | DIS3L   | Cytokinesis          | 19074876 |
| MIRT026460 | hsa-miR-192-5p  | ASPM    | Reproductive Process | 19074876 |
| MIRT026492 | hsa-miR-192-5p  | MNS1    | Reproductive Process | 19074876 |
| MIRT026532 | hsa-miR-192-5p  | IL15    | Development Process  | 19074876 |
| MIRT026539 | hsa-miR-192-5p  | TRIM59  | Cytokinesis          | 19074876 |

|            |                 |           |                      |          |
|------------|-----------------|-----------|----------------------|----------|
| MIRT026610 | hsa-miR-192-5p  | ANG       | Reproductive Process | 19074876 |
| MIRT026612 | hsa-miR-192-5p  | DST       | Cytokinesis          | 19074876 |
| MIRT026647 | hsa-miR-192-5p  | MPP5      | Development Process  | 19074876 |
| MIRT026660 | hsa-miR-192-5p  | SS18      | Development Process  | 19074876 |
| MIRT026724 | hsa-miR-192-5p  | SLC7A11   | Development Process  | 19074876 |
| MIRT026740 | hsa-miR-192-5p  | ID4       | Reproductive Process | 20371350 |
| MIRT026783 | hsa-miR-192-5p  | SNX10     | Development Process  | 19074876 |
| MIRT026800 | hsa-miR-192-5p  | RAD54B    | Reproductive Process | 19074876 |
| MIRT026817 | hsa-miR-192-5p  | EIF2AK3   | Development Process  | 19074876 |
| MIRT026832 | hsa-miR-192-5p  | DLGAP5    | Cytokinesis          | 19074876 |
| MIRT026859 | hsa-miR-192-5p  | KIF20A    | Cytokinesis          | 19074876 |
| MIRT026923 | hsa-miR-192-5p  | BORA      | Cytokinesis          | 19074876 |
| MIRT026947 | hsa-miR-192-5p  | MYB       | Development Process  | 19074876 |
| MIRT026998 | hsa-miR-103a-3p | CEP55     | Development Process  | 20371350 |
| MIRT027072 | hsa-miR-103a-3p | DMTF1     | Development Process  | 20371350 |
| MIRT027090 | hsa-miR-103a-3p | GABARAPL1 | Cytokinesis          | 20371350 |
| MIRT027137 | hsa-miR-103a-3p | AXIN2     | Embryo Development   | 20371350 |
| MIRT027137 | hsa-miR-103a-3p | AXIN2     | Embryo Development   | 23446348 |
| MIRT027137 | hsa-miR-103a-3p | AXIN2     | Embryo Development   | 21572407 |
| MIRT027302 | hsa-miR-101-3p  | ARID5B    | Reproductive Process | 20371350 |
| MIRT027315 | hsa-miR-101-3p  | MBTD1     | Embryo Development   | 20371350 |
| MIRT028035 | hsa-miR-93-5p   | FIGNL1    | Reproductive Process | 20371350 |
| MIRT028076 | hsa-miR-93-5p   | PLEKHA1   | Reproductive Process | 20371350 |
| MIRT028178 | hsa-miR-93-5p   | STAT3     | Reproductive Process | 20371350 |
| MIRT028178 | hsa-miR-93-5p   | STAT3     | Reproductive Process | 22473208 |
| MIRT028409 | hsa-miR-30a-5p  | SOD2      | Development Process  | 18668040 |
| MIRT028518 | hsa-miR-30a-5p  | CDC20     | Development Process  | 18668040 |
| MIRT028535 | hsa-miR-30a-5p  | KIF11     | Cytokinesis          | 18668040 |
| MIRT028535 | hsa-miR-30a-5p  | KIF11     | Cytokinesis          | 21572407 |
| MIRT028535 | hsa-miR-30a-5p  | KIF11     | Cytokinesis          | 20371350 |
| MIRT028604 | hsa-miR-30a-5p  | PSME4     | Reproductive Process | 18668040 |
| MIRT028614 | hsa-miR-30a-5p  | CAT       | Development Process  | 18668040 |
| MIRT028697 | hsa-miR-27a-3p  | ID4       | Reproductive Process | 20371350 |
| MIRT028724 | hsa-miR-27a-3p  | MBTD1     | Embryo Development   | 20371350 |
| MIRT030477 | hsa-miR-24-3p   | SRRT      | Development Process  | 17686970 |
| MIRT030627 | hsa-miR-24-3p   | CORO1A    | Cytokinesis          | 20138800 |
| MIRT030642 | hsa-miR-22-3p   | ARID5B    | Reproductive Process | 20371350 |
| MIRT030685 | hsa-miR-21-5p   | FANCI     | Cytokinesis          | 18591254 |
| MIRT030732 | hsa-miR-21-5p   | SYNE2     | Development Process  | 18591254 |
| MIRT030792 | hsa-miR-21-5p   | PLEKHA1   | Reproductive Process | 18591254 |

|            |                |           |                      |          |
|------------|----------------|-----------|----------------------|----------|
| MIRT030806 | hsa-miR-21-5p  | DMTF1     | Development Process  | 18591254 |
| MIRT030890 | hsa-miR-21-5p  | PTBP3     | Development Process  | 18591254 |
| MIRT030898 | hsa-miR-21-5p  | TRIM59    | Cytokinesis          | 18591254 |
| MIRT030914 | hsa-miR-21-5p  | TOP2A     | Embryo Development   | 18591254 |
| MIRT030917 | hsa-miR-21-5p  | MPP5      | Development Process  | 18591254 |
| MIRT030942 | hsa-miR-21-5p  | ADGRG2    | Reproductive Process | 18591254 |
| MIRT031079 | hsa-miR-21-5p  | STAT3     | Reproductive Process | 20048743 |
| MIRT031079 | hsa-miR-21-5p  | STAT3     | Reproductive Process | 18591254 |
| MIRT031079 | hsa-miR-21-5p  | STAT3     | Reproductive Process | 23998932 |
| MIRT031079 | hsa-miR-21-5p  | STAT3     | Reproductive Process | 26549725 |
| MIRT031165 | hsa-miR-19b-3p | TRIM59    | Cytokinesis          | 20371350 |
| MIRT031279 | hsa-miR-19b-3p | RASSF2    | Development Process  | 20371350 |
| MIRT031279 | hsa-miR-19b-3p | RASSF2    | Development Process  | 22473208 |
| MIRT031510 | hsa-miR-16-5p  | CEP55     | Development Process  | 20371350 |
| MIRT031510 | hsa-miR-16-5p  | CEP55     | Development Process  | 24398324 |
| MIRT031510 | hsa-miR-16-5p  | CEP55     | Development Process  | 23446348 |
| MIRT031510 | hsa-miR-16-5p  | CEP55     | Development Process  | 21572407 |
| MIRT031610 | hsa-miR-16-5p  | AIMP1     | Development Process  | 18668040 |
| MIRT031615 | hsa-miR-16-5p  | CDC20     | Development Process  | 18668040 |
| MIRT031653 | hsa-miR-16-5p  | GABARAPL1 | Cytokinesis          | 20371350 |
| MIRT031653 | hsa-miR-16-5p  | GABARAPL1 | Cytokinesis          | 23446348 |
| MIRT031653 | hsa-miR-16-5p  | GABARAPL1 | Cytokinesis          | 21572407 |
| MIRT031727 | hsa-miR-16-5p  | DMTF1     | Development Process  | 20371350 |
| MIRT031727 | hsa-miR-16-5p  | DMTF1     | Development Process  | 22473208 |
| MIRT031727 | hsa-miR-16-5p  | DMTF1     | Development Process  | 21572407 |
| MIRT031760 | hsa-miR-16-5p  | CNOT7     | Cytokinesis          | 18668040 |
| MIRT031808 | hsa-miR-16-5p  | HSPH1     | Cytokinesis          | 18668040 |
| MIRT031835 | hsa-miR-16-5p  | PSME4     | Reproductive Process | 18668040 |
| MIRT031894 | hsa-miR-16-5p  | EML4      | Cytokinesis          | 18668040 |
| MIRT031939 | hsa-miR-16-5p  | LAMB3     | Embryo Development   | 18668040 |
| MIRT031989 | hsa-miR-16-5p  | CASK      | Cytokinesis          | 18668040 |
| MIRT031989 | hsa-miR-16-5p  | CASK      | Cytokinesis          | 23446348 |
| MIRT031989 | hsa-miR-16-5p  | CASK      | Cytokinesis          | 22927820 |
| MIRT031989 | hsa-miR-16-5p  | CASK      | Cytokinesis          | 27292025 |
| MIRT031989 | hsa-miR-16-5p  | CASK      | Cytokinesis          | 27418678 |
| MIRT031989 | hsa-miR-16-5p  | CASK      | Cytokinesis          | 28735896 |
| MIRT032015 | hsa-miR-16-5p  | ARG2      | Development Process  | 21199864 |
| MIRT032381 | hsa-let-7b-5p  | ORC4      | Cytokinesis          | 18668040 |
| MIRT035524 | hsa-miR-21-5p  | BCL6      | Reproductive Process | 23416424 |
| MIRT038243 | hsa-miR-330-5p | LIF       | Embryo Development   | 23622248 |

|            |                 |          |                      |          |
|------------|-----------------|----------|----------------------|----------|
| MIRT038935 | hsa-miR-31-3p   | RICTOR   | Embryo Development   | 23622248 |
| MIRT039520 | hsa-miR-652-3p  | EML4     | Cytokinesis          | 23622248 |
| MIRT041291 | hsa-miR-193b-3p | TWF1     | Cytokinesis          | 23622248 |
| MIRT041373 | hsa-miR-193b-3p | ALDH3A2  | Development Process  | 23622248 |
| MIRT041390 | hsa-miR-193b-3p | HSPH1    | Cytokinesis          | 23622248 |
| MIRT041490 | hsa-miR-193b-3p | EP300    | Embryo Development   | 23622248 |
| MIRT041506 | hsa-miR-193b-3p | HSPA1L   | Reproductive Process | 23622248 |
| MIRT041646 | hsa-miR-484     | SYNE2    | Development Process  | 23622248 |
| MIRT041752 | hsa-miR-484     | H1FO     | Cytokinesis          | 23622248 |
| MIRT041782 | hsa-miR-484     | PTBP3    | Development Process  | 23622248 |
| MIRT041870 | hsa-miR-484     | ACTA2    | Development Process  | 23622248 |
| MIRT041922 | hsa-miR-484     | ZFR      | Development Process  | 23622248 |
| MIRT041943 | hsa-miR-484     | SRF      | Embryo Development   | 23622248 |
| MIRT042022 | hsa-miR-484     | DST      | Cytokinesis          | 23622248 |
| MIRT042140 | hsa-miR-484     | SP3      | Embryo Development   | 23622248 |
| MIRT042343 | hsa-miR-484     | SORD     | Reproductive Process | 23622248 |
| MIRT042423 | hsa-miR-425-3p  | PPARGC1A | Development Process  | 23622248 |
| MIRT042482 | hsa-miR-423-3p  | H1FO     | Cytokinesis          | 23622248 |
| MIRT042569 | hsa-miR-423-3p  | MYB      | Development Process  | 23622248 |
| MIRT042674 | hsa-miR-196b-5p | CKB      | Development Process  | 23622248 |
| MIRT043961 | hsa-miR-378a-5p | PPARGC1A | Development Process  | 23622248 |
| MIRT044195 | hsa-miR-99b-5p  | ETV6     | Reproductive Process | 23622248 |
| MIRT044244 | hsa-miR-29c-3p  | PPM1D    | Cytokinesis          | 23622248 |
| MIRT044358 | hsa-miR-106b-5p | CNOT7    | Cytokinesis          | 23622248 |
| MIRT044358 | hsa-miR-106b-5p | CNOT7    | Cytokinesis          | 22473208 |
| MIRT044887 | hsa-miR-193a-3p | LSM14B   | Development Process  | 23622248 |
| MIRT045708 | hsa-miR-125a-5p | PRC1     | Cytokinesis          | 23622248 |
| MIRT045823 | hsa-miR-140-5p  | EP300    | Embryo Development   | 23622248 |
| MIRT045837 | hsa-miR-133a-3p | NR4A2    | Development Process  | 23622248 |
| MIRT046026 | hsa-miR-125b-5p | FAT1     | Development Process  | 23622248 |
| MIRT046057 | hsa-miR-125b-5p | TEF      | Development Process  | 23622248 |
| MIRT046094 | hsa-miR-125b-5p | LSM14B   | Development Process  | 23622248 |
| MIRT046126 | hsa-miR-30b-5p  | HEY1     | Embryo Development   | 23622248 |
| MIRT046150 | hsa-miR-30b-5p  | TRIM59   | Cytokinesis          | 23622248 |
| MIRT046601 | hsa-miR-222-3p  | FAT1     | Development Process  | 23622248 |
| MIRT046625 | hsa-miR-222-3p  | HES1     | Embryo Development   | 23622248 |
| MIRT046768 | hsa-miR-222-3p  | SRRT     | Development Process  | 23622248 |
| MIRT046771 | hsa-miR-222-3p  | KIF4A    | Cytokinesis          | 23622248 |
| MIRT046813 | hsa-miR-222-3p  | SS18     | Development Process  | 23622248 |
| MIRT047114 | hsa-miR-183-5p  | FOXK2    | Development Process  | 23622248 |

|            |                 |          |                      |          |
|------------|-----------------|----------|----------------------|----------|
| MIRT047237 | hsa-miR-181b-5p | CAT      | Development Process  | 23622248 |
| MIRT047254 | hsa-miR-181b-5p | EP300    | Embryo Development   | 23622248 |
| MIRT047282 | hsa-miR-181b-5p | DIDO1    | Cytokinesis          | 23622248 |
| MIRT047315 | hsa-miR-181a-5p | FAT1     | Development Process  | 23622248 |
| MIRT047318 | hsa-miR-181a-5p | LAMA3    | Embryo Development   | 23622248 |
| MIRT047336 | hsa-miR-181a-5p | MTCL1    | Cytokinesis          | 23622248 |
| MIRT047352 | hsa-miR-34a-5p  | EXT2     | Embryo Development   | 23622248 |
| MIRT047657 | hsa-miR-10a-5p  | SORD     | Reproductive Process | 23622248 |
| MIRT047766 | hsa-miR-7-5p    | TOP2A    | Embryo Development   | 23622248 |
| MIRT047921 | hsa-miR-30c-5p  | CSNK1E   | Development Process  | 23622248 |
| MIRT047948 | hsa-miR-30c-5p  | EP300    | Embryo Development   | 23622248 |
| MIRT047996 | hsa-miR-30c-5p  | PTBP3    | Development Process  | 23622248 |
| MIRT048010 | hsa-miR-30c-5p  | HSPH1    | Cytokinesis          | 23622248 |
| MIRT048018 | hsa-miR-30c-5p  | EED      | Development Process  | 23622248 |
| MIRT048018 | hsa-miR-30c-5p  | EED      | Development Process  | 22473208 |
| MIRT048100 | hsa-miR-197-3p  | ACTL9    | Cytokinesis          | 23622248 |
| MIRT048115 | hsa-miR-197-3p  | PTBP3    | Development Process  | 23622248 |
| MIRT048264 | hsa-miR-196a-5p | NOTCH2   | Development Process  | 23622248 |
| MIRT048329 | hsa-miR-106a-5p | NOTCH2   | Development Process  | 23622248 |
| MIRT048807 | hsa-miR-93-5p   | H1FO     | Cytokinesis          | 23622248 |
| MIRT048842 | hsa-miR-93-5p   | IGF2     | Embryo Development   | 23622248 |
| MIRT048962 | hsa-miR-92a-3p  | ETV6     | Reproductive Process | 23622248 |
| MIRT049042 | hsa-miR-92a-3p  | DHRS3    | Development Process  | 23622248 |
| MIRT049047 | hsa-miR-92a-3p  | ADAMTS1  | Reproductive Process | 23622248 |
| MIRT049124 | hsa-miR-92a-3p  | CKB      | Development Process  | 23622248 |
| MIRT049128 | hsa-miR-92a-3p  | CC2D2A   | Embryo Development   | 23622248 |
| MIRT049289 | hsa-miR-92a-3p  | DIDO1    | Cytokinesis          | 23622248 |
| MIRT049359 | hsa-miR-92a-3p  | STAT3    | Reproductive Process | 23622248 |
| MIRT049359 | hsa-miR-92a-3p  | STAT3    | Reproductive Process | 23820254 |
| MIRT049389 | hsa-miR-92a-3p  | CDC20    | Development Process  | 23622248 |
| MIRT049463 | hsa-miR-92a-3p  | HSPH1    | Cytokinesis          | 23622248 |
| MIRT049494 | hsa-miR-92a-3p  | HES1     | Embryo Development   | 23622248 |
| MIRT049535 | hsa-miR-92a-3p  | ASS1     | Development Process  | 23622248 |
| MIRT049540 | hsa-miR-92a-3p  | KIF20A   | Cytokinesis          | 23622248 |
| MIRT049544 | hsa-miR-92a-3p  | NOTCH2   | Development Process  | 23622248 |
| MIRT049550 | hsa-miR-92a-3p  | TRAF3IP1 | Embryo Development   | 23622248 |
| MIRT049644 | hsa-miR-92a-3p  | PRC1     | Cytokinesis          | 23622248 |
| MIRT049730 | hsa-miR-92a-3p  | SRRT     | Development Process  | 23622248 |
| MIRT049738 | hsa-miR-92a-3p  | KLHL3    | Development Process  | 23622248 |
| MIRT049743 | hsa-miR-92a-3p  | EP300    | Embryo Development   | 23622248 |

|            |                 |          |                      |          |
|------------|-----------------|----------|----------------------|----------|
| MIRT049829 | hsa-miR-92a-3p  | SRF      | Embryo Development   | 23622248 |
| MIRT050017 | hsa-miR-27a-3p  | CEP55    | Development Process  | 23622248 |
| MIRT050193 | hsa-miR-26a-5p  | DST      | Cytokinesis          | 23622248 |
| MIRT050411 | hsa-miR-23a-3p  | KIF20A   | Cytokinesis          | 23622248 |
| MIRT050455 | hsa-miR-22-3p   | BUB1B    | Reproductive Process | 23622248 |
| MIRT050559 | hsa-miR-20a-5p  | STAT3    | Reproductive Process | 23622248 |
| MIRT050559 | hsa-miR-20a-5p  | STAT3    | Reproductive Process | 23836497 |
| MIRT050559 | hsa-miR-20a-5p  | STAT3    | Reproductive Process | 22473208 |
| MIRT050559 | hsa-miR-20a-5p  | STAT3    | Reproductive Process | 23059786 |
| MIRT050668 | hsa-miR-18a-5p  | RICTOR   | Embryo Development   | 23622248 |
| MIRT050708 | hsa-miR-18a-5p  | CDC20    | Development Process  | 23622248 |
| MIRT050834 | hsa-miR-17-5p   | CPE      | Development Process  | 23622248 |
| MIRT050867 | hsa-miR-17-5p   | CNEP1R1  | Cytokinesis          | 23622248 |
| MIRT050901 | hsa-miR-17-5p   | OFD1     | Development Process  | 23622248 |
| MIRT050917 | hsa-miR-17-5p   | TSC2     | Embryo Development   | 23622248 |
| MIRT050936 | hsa-miR-17-5p   | NOTCH2   | Development Process  | 23622248 |
| MIRT051399 | hsa-let-7f-5p   | CNEP1R1  | Cytokinesis          | 23622248 |
| MIRT051400 | hsa-let-7f-5p   | CCNB2    | Embryo Development   | 23622248 |
| MIRT051849 | hsa-let-7c-5p   | FANCI    | Cytokinesis          | 23622248 |
| MIRT051850 | hsa-let-7c-5p   | NOTCH2   | Development Process  | 23622248 |
| MIRT051866 | hsa-let-7c-5p   | CCNB2    | Embryo Development   | 23622248 |
| MIRT051889 | hsa-let-7b-5p   | CCNB2    | Embryo Development   | 23622248 |
| MIRT051970 | hsa-let-7b-5p   | PPARGC1A | Development Process  | 23622248 |
| MIRT051991 | hsa-let-7b-5p   | HES1     | Embryo Development   | 23622248 |
| MIRT051995 | hsa-let-7b-5p   | EP300    | Embryo Development   | 23622248 |
| MIRT052032 | hsa-let-7b-5p   | CEP126   | Cytokinesis          | 23622248 |
| MIRT052060 | hsa-let-7b-5p   | SYNE2    | Development Process  | 23622248 |
| MIRT052190 | hsa-let-7b-5p   | CKB      | Development Process  | 23622248 |
| MIRT052457 | hsa-let-7a-5p   | H1F0     | Cytokinesis          | 23622248 |
| MIRT052495 | hsa-let-7a-5p   | ASPM     | Reproductive Process | 23622248 |
| MIRT052528 | hsa-let-7a-5p   | HOXC4    | Embryo Development   | 23622248 |
| MIRT052637 | hsa-let-7a-5p   | CCNB2    | Embryo Development   | 23622248 |
| MIRT052922 | hsa-miR-200a-3p | MYB      | Development Process  | 22101269 |
| MIRT052923 | hsa-miR-200b-3p | MYB      | Development Process  | 22101269 |
| MIRT052964 | hsa-miR-200c-3p | MYB      | Development Process  | 22101269 |
| MIRT052965 | hsa-miR-429     | MYB      | Development Process  | 22101269 |
| MIRT052999 | hsa-miR-100-5p  | IGF2     | Embryo Development   | 22926517 |
| MIRT053039 | hsa-miR-181a-5p | COL16A1  | Reproductive Process | 23238588 |
| MIRT053071 | hsa-miR-130b-3p | STAT3    | Reproductive Process | 24040078 |
| MIRT053071 | hsa-miR-130b-3p | STAT3    | Reproductive Process | 26475357 |

|            |                 |         |                      |          |
|------------|-----------------|---------|----------------------|----------|
| MIRT053156 | hsa-miR-125a-5p | TEF     | Development Process  | 24675842 |
| MIRT053173 | hsa-miR-21-5p   | HPGD    | Reproductive Process | 24699315 |
| MIRT053229 | hsa-miR-106a-5p | STAT3   | Reproductive Process | 23836497 |
| MIRT053229 | hsa-miR-106a-5p | STAT3   | Reproductive Process | 23399684 |
| MIRT053229 | hsa-miR-106a-5p | STAT3   | Reproductive Process | 27325313 |
| MIRT053299 | hsa-miR-372-3p  | DKK1    | Embryo Development   | 22020335 |
| MIRT053300 | hsa-miR-373-3p  | DKK1    | Embryo Development   | 22020335 |
| MIRT053300 | hsa-miR-373-3p  | DKK1    | Embryo Development   | 28337453 |
| MIRT053445 | hsa-miR-203a-3p | SMAD9   | Development Process  | 23807165 |
| MIRT053497 | hsa-miR-200c-3p | EFNA1   | Embryo Development   | 23065816 |
| MIRT053745 | hsa-miR-29b-3p  | MAP2K6  | Reproductive Process | 22942087 |
| MIRT053748 | hsa-miR-29b-3p  | NOTCH2  | Development Process  | 22942087 |
| MIRT054144 | hsa-miR-106b-5p | STAT3   | Reproductive Process | 25307786 |
| MIRT054144 | hsa-miR-106b-5p | STAT3   | Reproductive Process | 22473208 |
| MIRT054144 | hsa-miR-106b-5p | STAT3   | Reproductive Process | 26956882 |
| MIRT054144 | hsa-miR-106b-5p | STAT3   | Reproductive Process | 27325313 |
| MIRT054155 | hsa-miR-203a-3p | CASK    | Cytokinesis          | 25373785 |
| MIRT054186 | hsa-miR-210-3p  | PTBP3   | Development Process  | 23024754 |
| MIRT054244 | hsa-miR-574-3p  | EP300   | Embryo Development   | 23554959 |
| MIRT054262 | hsa-miR-103a-3p | MYB     | Development Process  | 25530421 |
| MIRT054262 | hsa-miR-103a-3p | MYB     | Development Process  | 27888798 |
| MIRT054375 | hsa-miR-205-5p  | BCL6    | Reproductive Process | 22870299 |
| MIRT054414 | hsa-miR-27a-3p  | SLC7A11 | Development Process  | 24516043 |
| MIRT054582 | hsa-miR-30b-5p  | SIX1    | Embryo Development   | 24593661 |
| MIRT054810 | hsa-miR-34a-5p  | RICTOR  | Embryo Development   | 24944883 |
| MIRT054822 | hsa-miR-30c-5p  | IDH1    | Reproductive Process | 24623846 |
| MIRT054849 | hsa-miR-335-5p  | SOX17   | Embryo Development   | 24449834 |
| MIRT054890 | hsa-miR-195-5p  | MYB     | Development Process  | 24486218 |
| MIRT054903 | hsa-miR-17-5p   | STAT3   | Reproductive Process | 25594054 |
| MIRT054903 | hsa-miR-17-5p   | STAT3   | Reproductive Process | 22473208 |
| MIRT054903 | hsa-miR-17-5p   | STAT3   | Reproductive Process | 23059786 |
| MIRT055787 | hsa-miR-92a-3p  | PLEKHA1 | Reproductive Process | 23592263 |
| MIRT055787 | hsa-miR-92a-3p  | PLEKHA1 | Reproductive Process | 24398324 |
| MIRT055787 | hsa-miR-92a-3p  | PLEKHA1 | Reproductive Process | 23446348 |
| MIRT055787 | hsa-miR-92a-3p  | PLEKHA1 | Reproductive Process | 22012620 |
| MIRT055787 | hsa-miR-92a-3p  | PLEKHA1 | Reproductive Process | 21572407 |
| MIRT055787 | hsa-miR-92a-3p  | PLEKHA1 | Reproductive Process | 20371350 |
| MIRT055811 | hsa-miR-15a-5p  | PLEKHA1 | Reproductive Process | 21572407 |
| MIRT055812 | hsa-miR-16-5p   | PLEKHA1 | Reproductive Process | 21572407 |
| MIRT055813 | hsa-miR-103a-3p | PLEKHA1 | Reproductive Process | 24398324 |

|            |                 |         |                      |          |
|------------|-----------------|---------|----------------------|----------|
| MIRT055813 | hsa-miR-103a-3p | PLEKHA1 | Reproductive Process | 23446348 |
| MIRT055813 | hsa-miR-103a-3p | PLEKHA1 | Reproductive Process | 22012620 |
| MIRT055813 | hsa-miR-103a-3p | PLEKHA1 | Reproductive Process | 21572407 |
| MIRT055813 | hsa-miR-103a-3p | PLEKHA1 | Reproductive Process | 20371350 |
| MIRT055816 | hsa-miR-15b-5p  | PLEKHA1 | Reproductive Process | 21572407 |
| MIRT055817 | hsa-miR-195-5p  | PLEKHA1 | Reproductive Process | 21572407 |
| MIRT056750 | hsa-miR-196a-5p | ARID5B  | Reproductive Process | 23592263 |
| MIRT056751 | hsa-miR-196b-5p | ARID5B  | Reproductive Process | 23592263 |
| MIRT057483 | hsa-miR-30c-5p  | KIF11   | Cytokinesis          | 21572407 |
| MIRT057483 | hsa-miR-30c-5p  | KIF11   | Cytokinesis          | 20371350 |
| MIRT057484 | hsa-miR-30d-5p  | KIF11   | Cytokinesis          | 21572407 |
| MIRT057484 | hsa-miR-30d-5p  | KIF11   | Cytokinesis          | 20371350 |
| MIRT057485 | hsa-miR-30b-5p  | KIF11   | Cytokinesis          | 21572407 |
| MIRT057485 | hsa-miR-30b-5p  | KIF11   | Cytokinesis          | 20371350 |
| MIRT057486 | hsa-miR-30e-5p  | KIF11   | Cytokinesis          | 21572407 |
| MIRT057486 | hsa-miR-30e-5p  | KIF11   | Cytokinesis          | 20371350 |
| MIRT057490 | hsa-miR-19a-3p  | CEP55   | Development Process  | 21572407 |
| MIRT057490 | hsa-miR-19a-3p  | CEP55   | Development Process  | 20371350 |
| MIRT057491 | hsa-miR-19b-3p  | CEP55   | Development Process  | 21572407 |
| MIRT057491 | hsa-miR-19b-3p  | CEP55   | Development Process  | 20371350 |
| MIRT057494 | hsa-miR-130a-3p | CEP55   | Development Process  | 21572407 |
| MIRT057494 | hsa-miR-130a-3p | CEP55   | Development Process  | 20371350 |
| MIRT057495 | hsa-miR-152-3p  | CEP55   | Development Process  | 21572407 |
| MIRT057495 | hsa-miR-152-3p  | CEP55   | Development Process  | 20371350 |
| MIRT057497 | hsa-miR-130b-3p | CEP55   | Development Process  | 21572407 |
| MIRT057497 | hsa-miR-130b-3p | CEP55   | Development Process  | 20371350 |
| MIRT057514 | hsa-miR-15a-5p  | CEP55   | Development Process  | 24398324 |
| MIRT057514 | hsa-miR-15a-5p  | CEP55   | Development Process  | 23446348 |
| MIRT057514 | hsa-miR-15a-5p  | CEP55   | Development Process  | 21572407 |
| MIRT057514 | hsa-miR-15a-5p  | CEP55   | Development Process  | 20371350 |
| MIRT057516 | hsa-miR-15b-5p  | CEP55   | Development Process  | 24398324 |
| MIRT057516 | hsa-miR-15b-5p  | CEP55   | Development Process  | 23446348 |
| MIRT057516 | hsa-miR-15b-5p  | CEP55   | Development Process  | 21572407 |
| MIRT057516 | hsa-miR-15b-5p  | CEP55   | Development Process  | 20371350 |
| MIRT057517 | hsa-miR-195-5p  | CEP55   | Development Process  | 24398324 |
| MIRT057517 | hsa-miR-195-5p  | CEP55   | Development Process  | 23446348 |
| MIRT057517 | hsa-miR-195-5p  | CEP55   | Development Process  | 21572407 |
| MIRT057517 | hsa-miR-195-5p  | CEP55   | Development Process  | 20371350 |
| MIRT059817 | hsa-miR-4306    | EFNA1   | Embryo Development   | 23592263 |
| MIRT059817 | hsa-miR-4306    | EFNA1   | Embryo Development   | 26701625 |



|            |                 |         |                     |          |
|------------|-----------------|---------|---------------------|----------|
| MIRT074762 | hsa-miR-92a-3p  | CNEP1R1 | Cytokinesis         | 22473208 |
| MIRT074762 | hsa-miR-92a-3p  | CNEP1R1 | Cytokinesis         | 21572407 |
| MIRT079410 | hsa-miR-17-5p   | FOXK2   | Development Process | 22473208 |
| MIRT079410 | hsa-miR-17-5p   | FOXK2   | Development Process | 23446348 |
| MIRT079410 | hsa-miR-17-5p   | FOXK2   | Development Process | 21572407 |
| MIRT079411 | hsa-miR-20a-5p  | FOXK2   | Development Process | 22473208 |
| MIRT079411 | hsa-miR-20a-5p  | FOXK2   | Development Process | 23446348 |
| MIRT079411 | hsa-miR-20a-5p  | FOXK2   | Development Process | 21572407 |
| MIRT079412 | hsa-miR-93-5p   | FOXK2   | Development Process | 22473208 |
| MIRT079412 | hsa-miR-93-5p   | FOXK2   | Development Process | 23446348 |
| MIRT079412 | hsa-miR-93-5p   | FOXK2   | Development Process | 21572407 |
| MIRT079413 | hsa-miR-106a-5p | FOXK2   | Development Process | 23446348 |
| MIRT079413 | hsa-miR-106a-5p | FOXK2   | Development Process | 21572407 |
| MIRT079414 | hsa-miR-7-5p    | FOXK2   | Development Process | 23446348 |
| MIRT079414 | hsa-miR-7-5p    | FOXK2   | Development Process | 21572407 |
| MIRT079415 | hsa-miR-106b-5p | FOXK2   | Development Process | 22473208 |
| MIRT079415 | hsa-miR-106b-5p | FOXK2   | Development Process | 23446348 |
| MIRT079415 | hsa-miR-106b-5p | FOXK2   | Development Process | 21572407 |
| MIRT079419 | hsa-miR-302d-3p | FOXK2   | Development Process | 23446348 |
| MIRT079419 | hsa-miR-302d-3p | FOXK2   | Development Process | 21572407 |
| MIRT079420 | hsa-miR-372-3p  | FOXK2   | Development Process | 23446348 |
| MIRT079420 | hsa-miR-372-3p  | FOXK2   | Development Process | 21572407 |
| MIRT079421 | hsa-miR-373-3p  | FOXK2   | Development Process | 23446348 |
| MIRT079421 | hsa-miR-373-3p  | FOXK2   | Development Process | 21572407 |
| MIRT079422 | hsa-miR-20b-5p  | FOXK2   | Development Process | 22473208 |
| MIRT079422 | hsa-miR-20b-5p  | FOXK2   | Development Process | 23446348 |
| MIRT079422 | hsa-miR-20b-5p  | FOXK2   | Development Process | 21572407 |
| MIRT088679 | hsa-miR-30a-5p  | EML4    | Cytokinesis         | 23592263 |
| MIRT088679 | hsa-miR-30a-5p  | EML4    | Cytokinesis         | 21572407 |
| MIRT088680 | hsa-miR-30c-5p  | EML4    | Cytokinesis         | 23592263 |
| MIRT088680 | hsa-miR-30c-5p  | EML4    | Cytokinesis         | 21572407 |
| MIRT088681 | hsa-miR-30d-5p  | EML4    | Cytokinesis         | 23592263 |
| MIRT088681 | hsa-miR-30d-5p  | EML4    | Cytokinesis         | 21572407 |
| MIRT088682 | hsa-miR-30e-5p  | EML4    | Cytokinesis         | 23592263 |
| MIRT088682 | hsa-miR-30e-5p  | EML4    | Cytokinesis         | 21572407 |
| MIRT089105 | hsa-miR-15a-5p  | B3GNT2  | Development Process | 21572407 |
| MIRT089105 | hsa-miR-15a-5p  | B3GNT2  | Development Process | 20371350 |
| MIRT089106 | hsa-miR-16-5p   | B3GNT2  | Development Process | 21572407 |
| MIRT089106 | hsa-miR-16-5p   | B3GNT2  | Development Process | 20371350 |
| MIRT089108 | hsa-miR-103a-3p | B3GNT2  | Development Process | 21572407 |

|            |                 |         |                      |          |
|------------|-----------------|---------|----------------------|----------|
| MIRT089108 | hsa-miR-103a-3p | B3GNT2  | Development Process  | 20371350 |
| MIRT089110 | hsa-miR-15b-5p  | B3GNT2  | Development Process  | 21572407 |
| MIRT089110 | hsa-miR-15b-5p  | B3GNT2  | Development Process  | 20371350 |
| MIRT089111 | hsa-miR-195-5p  | B3GNT2  | Development Process  | 21572407 |
| MIRT089111 | hsa-miR-195-5p  | B3GNT2  | Development Process  | 20371350 |
| MIRT093076 | hsa-miR-19a-3p  | SLC7A11 | Development Process  | 21572407 |
| MIRT093077 | hsa-miR-19b-3p  | SLC7A11 | Development Process  | 21572407 |
| MIRT099596 | hsa-miR-18a-5p  | ID4     | Reproductive Process | 20371350 |
| MIRT099597 | hsa-miR-10a-5p  | ID4     | Reproductive Process | 23446348 |
| MIRT099597 | hsa-miR-10a-5p  | ID4     | Reproductive Process | 22012620 |
| MIRT099597 | hsa-miR-10a-5p  | ID4     | Reproductive Process | 20371350 |
| MIRT099598 | hsa-miR-10b-5p  | ID4     | Reproductive Process | 23446348 |
| MIRT099598 | hsa-miR-10b-5p  | ID4     | Reproductive Process | 22012620 |
| MIRT099598 | hsa-miR-10b-5p  | ID4     | Reproductive Process | 20371350 |
| MIRT099599 | hsa-miR-18b-5p  | ID4     | Reproductive Process | 20371350 |
| MIRT099600 | hsa-miR-486-5p  | ID4     | Reproductive Process | 23446348 |
| MIRT099600 | hsa-miR-486-5p  | ID4     | Reproductive Process | 22012620 |
| MIRT099600 | hsa-miR-486-5p  | ID4     | Reproductive Process | 20371350 |
| MIRT100353 | hsa-miR-223-5p  | HSPA1A  | Cytokinesis          | 22012620 |
| MIRT102166 | hsa-miR-196b-5p | SRRT    | Development Process  | 24398324 |
| MIRT102166 | hsa-miR-196b-5p | SRRT    | Development Process  | 23446348 |
| MIRT102166 | hsa-miR-196b-5p | SRRT    | Development Process  | 21572407 |
| MIRT102166 | hsa-miR-196b-5p | SRRT    | Development Process  | 20371350 |
| MIRT103433 | hsa-miR-92a-3p  | SNX10   | Development Process  | 22473208 |
| MIRT104234 | hsa-miR-15b-5p  | DMTF1   | Development Process  | 22473208 |
| MIRT104234 | hsa-miR-15b-5p  | DMTF1   | Development Process  | 21572407 |
| MIRT104235 | hsa-miR-195-5p  | DMTF1   | Development Process  | 22473208 |
| MIRT104235 | hsa-miR-195-5p  | DMTF1   | Development Process  | 21572407 |
| MIRT106868 | hsa-miR-181a-5p | PTBP3   | Development Process  | 23824327 |
| MIRT106869 | hsa-miR-181b-5p | PTBP3   | Development Process  | 23824327 |
| MIRT138701 | hsa-miR-302d-3p | MPP5    | Development Process  | 22012620 |
| MIRT138702 | hsa-miR-372-3p  | MPP5    | Development Process  | 22012620 |
| MIRT138703 | hsa-miR-373-3p  | MPP5    | Development Process  | 22012620 |
| MIRT145857 | hsa-miR-200a-3p | STAT3   | Reproductive Process | 26535690 |
| MIRT154043 | hsa-miR-15a-5p  | RASSF2  | Development Process  | 23708386 |
| MIRT154044 | hsa-miR-16-5p   | RASSF2  | Development Process  | 23708386 |
| MIRT154048 | hsa-miR-15b-5p  | RASSF2  | Development Process  | 23708386 |
| MIRT154051 | hsa-miR-195-5p  | RASSF2  | Development Process  | 23708386 |
| MIRT171395 | hsa-miR-155-5p  | DMTF1   | Development Process  | 22473208 |
| MIRT172594 | hsa-miR-19a-3p  | CNOT7   | Cytokinesis          | 22473208 |

|            |                 |           |                      |          |
|------------|-----------------|-----------|----------------------|----------|
| MIRT172596 | hsa-miR-19b-3p  | CNOT7     | Cytokinesis          | 22473208 |
| MIRT180171 | hsa-miR-182-5p  | NOTCH2    | Development Process  | 23824327 |
| MIRT186534 | hsa-miR-92a-3p  | TWF1      | Cytokinesis          | 23592263 |
| MIRT186534 | hsa-miR-92a-3p  | TWF1      | Cytokinesis          | 20371350 |
| MIRT197720 | hsa-miR-15b-5p  | PPM1D     | Cytokinesis          | 25092292 |
| MIRT204830 | hsa-miR-106b-5p | CASP8     | Embryo Development   | 24166509 |
| MIRT206479 | hsa-miR-142-3p  | EML4      | Cytokinesis          | 22473208 |
| MIRT242416 | hsa-miR-92a-3p  | CCDC113   | Cytokinesis          | 22473208 |
| MIRT242416 | hsa-miR-92a-3p  | CCDC113   | Cytokinesis          | 23824327 |
| MIRT245473 | hsa-miR-4306    | ARID5B    | Reproductive Process | 23313552 |
| MIRT247368 | hsa-miR-15a-5p  | GABARAPL1 | Cytokinesis          | 23446348 |
| MIRT247368 | hsa-miR-15a-5p  | GABARAPL1 | Cytokinesis          | 21572407 |
| MIRT247368 | hsa-miR-15a-5p  | GABARAPL1 | Cytokinesis          | 20371350 |
| MIRT247369 | hsa-miR-15b-5p  | GABARAPL1 | Cytokinesis          | 23446348 |
| MIRT247369 | hsa-miR-15b-5p  | GABARAPL1 | Cytokinesis          | 21572407 |
| MIRT247369 | hsa-miR-15b-5p  | GABARAPL1 | Cytokinesis          | 20371350 |
| MIRT247370 | hsa-miR-195-5p  | GABARAPL1 | Cytokinesis          | 23446348 |
| MIRT247370 | hsa-miR-195-5p  | GABARAPL1 | Cytokinesis          | 21572407 |
| MIRT247370 | hsa-miR-195-5p  | GABARAPL1 | Cytokinesis          | 20371350 |
| MIRT257371 | hsa-miR-181a-5p | ID4       | Reproductive Process | 20371350 |
| MIRT257372 | hsa-miR-181b-5p | ID4       | Reproductive Process | 20371350 |
| MIRT270030 | hsa-miR-143-3p  | GABARAPL1 | Cytokinesis          | 26349981 |
| MIRT279714 | hsa-let-7a-5p   | ARG2      | Development Process  | 26989813 |
| MIRT284089 | hsa-miR-199a-3p | CNEP1R1   | Cytokinesis          | 23313552 |
| MIRT301709 | hsa-miR-92a-3p  | TEF       | Development Process  | 20371350 |
| MIRT309648 | hsa-miR-129-5p  | CPE       | Development Process  | 23824327 |
| MIRT309648 | hsa-miR-129-5p  | CPE       | Development Process  | 27418678 |
| MIRT317106 | hsa-miR-223-5p  | ID4       | Reproductive Process | 20371350 |
| MIRT405809 | hsa-miR-129-5p  | SIX1      | Embryo Development   | 23824327 |
| MIRT437348 | hsa-let-7c-5p   | RICTOR    | Embryo Development   | 25311506 |
| MIRT437349 | hsa-miR-16-5p   | RICTOR    | Embryo Development   | 25311506 |
| MIRT437377 | hsa-miR-125b-5p | ENPEP     | Development Process  | 24098452 |
| MIRT437478 | hsa-miR-663a    | MYL9      | Cytokinesis          | 24014830 |
| MIRT437606 | hsa-miR-142-3p  | TWF1      | Cytokinesis          | 23592263 |
| MIRT437606 | hsa-miR-142-3p  | TWF1      | Cytokinesis          | 20371350 |
| MIRT437606 | hsa-miR-142-3p  | TWF1      | Cytokinesis          | 22815788 |
| MIRT437668 | hsa-miR-214-3p  | ABLIM3    | Cytokinesis          | 22815788 |
| MIRT437675 | hsa-miR-214-3p  | TWF1      | Cytokinesis          | 22815788 |
| MIRT437690 | hsa-miR-223-3p  | TWF1      | Cytokinesis          | 22815788 |
| MIRT437721 | hsa-miR-29a-3p  | AMFR      | Development Process  | 22815788 |

|            |                 |          |                      |          |
|------------|-----------------|----------|----------------------|----------|
| MIRT437722 | hsa-miR-29b-3p  | AMFR     | Development Process  | 22815788 |
| MIRT437723 | hsa-miR-29c-3p  | AMFR     | Development Process  | 22815788 |
| MIRT437777 | hsa-miR-1-3p    | TH       | Embryo Development   | 25512392 |
| MIRT437882 | hsa-miR-17-5p   | CLU      | Development Process  | 23436804 |
| MIRT437939 | hsa-miR-34a-5p  | ARHGDIB  | Development Process  | 23349340 |
| MIRT438217 | hsa-miR-181a-5p | STAT3    | Reproductive Process | 24329418 |
| MIRT438224 | hsa-miR-21-5p   | CLU      | Development Process  | 24327270 |
| MIRT438421 | hsa-miR-24-3p   | TACC3    | Development Process  | 23174883 |
| MIRT438422 | hsa-miR-152-3p  | TACC3    | Development Process  | 23174883 |
| MIRT438552 | hsa-miR-130b-3p | PPARGC1A | Development Process  | 23868745 |
| MIRT438607 | hsa-miR-125b-5p | DUSP6    | Development Process  | 25001178 |
| MIRT438639 | hsa-miR-122-5p  | AXL      | Reproductive Process | 24113455 |
| MIRT439144 | hsa-let-7c-5p   | SPDEF    | Development Process  | 25074381 |
| MIRT439371 | hsa-miR-106b-5p | TWF1     | Cytokinesis          | 22473208 |
| MIRT439372 | hsa-miR-20a-5p  | TWF1     | Cytokinesis          | 22473208 |
| MIRT439540 | hsa-miR-142-3p  | SS18     | Development Process  | 22473208 |
| MIRT439564 | hsa-miR-382-5p  | MTCL1    | Cytokinesis          | 24374217 |
| MIRT439566 | hsa-miR-20a-5p  | SOD2     | Development Process  | 22473208 |
| MIRT439566 | hsa-miR-20a-5p  | SOD2     | Development Process  | 22012620 |
| MIRT439567 | hsa-miR-106b-5p | SOD2     | Development Process  | 22473208 |
| MIRT439567 | hsa-miR-106b-5p | SOD2     | Development Process  | 22012620 |
| MIRT439593 | hsa-miR-142-3p  | SLC7A11  | Development Process  | 22473208 |
| MIRT439769 | hsa-miR-142-3p  | RICTOR   | Embryo Development   | 22473208 |
| MIRT440100 | hsa-miR-205-5p  | NOTCH2   | Development Process  | 22473208 |
| MIRT440368 | hsa-miR-155-5p  | KIF3A    | Development Process  | 22473208 |
| MIRT440468 | hsa-miR-106b-5p | IER3     | Development Process  | 22473208 |
| MIRT440469 | hsa-miR-20a-5p  | IER3     | Development Process  | 22473208 |
| MIRT440866 | hsa-miR-210-3p  | CSNK1E   | Development Process  | 22473208 |
| MIRT440918 | hsa-miR-20a-5p  | CNOT7    | Cytokinesis          | 22473208 |
| MIRT442592 | hsa-miR-203a-3p | SIX1     | Embryo Development   | 22100165 |
| MIRT442903 | hsa-miR-199a-3p | SOD2     | Development Process  | 22100165 |
| MIRT451868 | hsa-miR-4306    | SOD2     | Development Process  | 23592263 |
| MIRT451868 | hsa-miR-4306    | SOD2     | Development Process  | 24398324 |
| MIRT451868 | hsa-miR-4306    | SOD2     | Development Process  | 23446348 |
| MIRT451868 | hsa-miR-4306    | SOD2     | Development Process  | 21572407 |
| MIRT451876 | hsa-miR-539-5p  | SOD2     | Development Process  | 23592263 |
| MIRT451876 | hsa-miR-539-5p  | SOD2     | Development Process  | 24398324 |
| MIRT451876 | hsa-miR-539-5p  | SOD2     | Development Process  | 23446348 |
| MIRT451876 | hsa-miR-539-5p  | SOD2     | Development Process  | 21572407 |
| MIRT453742 | hsa-miR-4306    | CSNK1E   | Development Process  | 23592263 |

|            |                 |         |                      |          |
|------------|-----------------|---------|----------------------|----------|
| MIRT453751 | hsa-miR-195-5p  | CSNK1E  | Development Process  | 23592263 |
| MIRT453752 | hsa-miR-16-5p   | CSNK1E  | Development Process  | 23592263 |
| MIRT453753 | hsa-miR-15b-5p  | CSNK1E  | Development Process  | 23592263 |
| MIRT453754 | hsa-miR-15a-5p  | CSNK1E  | Development Process  | 23592263 |
| MIRT454267 | hsa-miR-4772-3p | PSMA1   | Cytokinesis          | 23592263 |
| MIRT469208 | hsa-miR-625-5p  | RICTOR  | Embryo Development   | 23592263 |
| MIRT470910 | hsa-miR-411-5p  | PLEKHA1 | Reproductive Process | 23592263 |
| MIRT470910 | hsa-miR-411-5p  | PLEKHA1 | Reproductive Process | 24398324 |
| MIRT470910 | hsa-miR-411-5p  | PLEKHA1 | Reproductive Process | 23446348 |
| MIRT470910 | hsa-miR-411-5p  | PLEKHA1 | Reproductive Process | 22012620 |
| MIRT470910 | hsa-miR-411-5p  | PLEKHA1 | Reproductive Process | 21572407 |
| MIRT470910 | hsa-miR-411-5p  | PLEKHA1 | Reproductive Process | 20371350 |
| MIRT473845 | hsa-miR-411-5p  | MAP2K6  | Reproductive Process | 23592263 |
| MIRT476749 | hsa-miR-199a-3p | FOXK2   | Development Process  | 23592263 |
| MIRT476756 | hsa-miR-203a-3p | FOXK2   | Development Process  | 23592263 |
| MIRT477653 | hsa-miR-940     | EFNA1   | Embryo Development   | 23592263 |
| MIRT478677 | hsa-miR-142-3p  | CSRP2   | Development Process  | 23592263 |
| MIRT478677 | hsa-miR-142-3p  | CSRP2   | Development Process  | 21572407 |
| MIRT478678 | hsa-miR-155-5p  | CSRP2   | Development Process  | 23592263 |
| MIRT478678 | hsa-miR-155-5p  | CSRP2   | Development Process  | 21572407 |
| MIRT478692 | hsa-miR-27a-3p  | CSRP2   | Development Process  | 23592263 |
| MIRT478692 | hsa-miR-27a-3p  | CSRP2   | Development Process  | 21572407 |
| MIRT478695 | hsa-miR-128-3p  | CSRP2   | Development Process  | 23592263 |
| MIRT478695 | hsa-miR-128-3p  | CSRP2   | Development Process  | 21572407 |
| MIRT478698 | hsa-miR-199a-3p | CSRP2   | Development Process  | 23592263 |
| MIRT478698 | hsa-miR-199a-3p | CSRP2   | Development Process  | 21572407 |
| MIRT481095 | hsa-miR-24-3p   | B3GNT2  | Development Process  | 23592263 |
| MIRT488649 | hsa-miR-483-5p  | HAND2   | Embryo Development   | 23592263 |
| MIRT489752 | hsa-miR-663a    | TACC3   | Development Process  | 23592263 |
| MIRT493009 | hsa-miR-423-5p  | NANOS1  | Development Process  | 23592263 |
| MIRT496595 | hsa-miR-423-5p  | TAGLN   | Development Process  | 22291592 |
| MIRT498666 | hsa-miR-197-3p  | SOD2    | Development Process  | 24398324 |
| MIRT498666 | hsa-miR-197-3p  | SOD2    | Development Process  | 22012620 |
| MIRT498670 | hsa-miR-203a-3p | SOD2    | Development Process  | 24398324 |
| MIRT498670 | hsa-miR-203a-3p | SOD2    | Development Process  | 22012620 |
| MIRT498972 | hsa-miR-103a-3p | ORC4    | Cytokinesis          | 24398324 |
| MIRT498972 | hsa-miR-103a-3p | ORC4    | Cytokinesis          | 23446348 |
| MIRT498972 | hsa-miR-103a-3p | ORC4    | Cytokinesis          | 21572407 |
| MIRT498972 | hsa-miR-103a-3p | ORC4    | Cytokinesis          | 20371350 |
| MIRT498972 | hsa-miR-103a-3p | ORC4    | Cytokinesis          | 27292025 |

|            |                |       |                     |          |
|------------|----------------|-------|---------------------|----------|
| MIRT498981 | hsa-miR-195-5p | ORC4  | Cytokinesis         | 24398324 |
| MIRT498981 | hsa-miR-195-5p | ORC4  | Cytokinesis         | 23446348 |
| MIRT498981 | hsa-miR-195-5p | ORC4  | Cytokinesis         | 21572407 |
| MIRT498981 | hsa-miR-195-5p | ORC4  | Cytokinesis         | 20371350 |
| MIRT498981 | hsa-miR-195-5p | ORC4  | Cytokinesis         | 27292025 |
| MIRT498982 | hsa-miR-16-5p  | ORC4  | Cytokinesis         | 24398324 |
| MIRT498982 | hsa-miR-16-5p  | ORC4  | Cytokinesis         | 23446348 |
| MIRT498982 | hsa-miR-16-5p  | ORC4  | Cytokinesis         | 21572407 |
| MIRT498982 | hsa-miR-16-5p  | ORC4  | Cytokinesis         | 20371350 |
| MIRT498982 | hsa-miR-16-5p  | ORC4  | Cytokinesis         | 27292025 |
| MIRT498983 | hsa-miR-15b-5p | ORC4  | Cytokinesis         | 24398324 |
| MIRT498983 | hsa-miR-15b-5p | ORC4  | Cytokinesis         | 23446348 |
| MIRT498983 | hsa-miR-15b-5p | ORC4  | Cytokinesis         | 21572407 |
| MIRT498983 | hsa-miR-15b-5p | ORC4  | Cytokinesis         | 20371350 |
| MIRT498983 | hsa-miR-15b-5p | ORC4  | Cytokinesis         | 27292025 |
| MIRT498984 | hsa-miR-15a-5p | ORC4  | Cytokinesis         | 24398324 |
| MIRT498984 | hsa-miR-15a-5p | ORC4  | Cytokinesis         | 23446348 |
| MIRT498984 | hsa-miR-15a-5p | ORC4  | Cytokinesis         | 21572407 |
| MIRT498984 | hsa-miR-15a-5p | ORC4  | Cytokinesis         | 20371350 |
| MIRT498984 | hsa-miR-15a-5p | ORC4  | Cytokinesis         | 27292025 |
| MIRT499576 | hsa-miR-31-5p  | INTU  | Embryo Development  | 24398324 |
| MIRT499587 | hsa-miR-7-5p   | INTU  | Embryo Development  | 24398324 |
| MIRT499587 | hsa-miR-7-5p   | INTU  | Embryo Development  | 20371350 |
| MIRT504352 | hsa-miR-23a-3p | VCAM1 | Development Process | 23446348 |
| MIRT504352 | hsa-miR-23a-3p | VCAM1 | Development Process | 21572407 |
| MIRT504352 | hsa-miR-23a-3p | VCAM1 | Development Process | 23824327 |
| MIRT504352 | hsa-miR-23a-3p | VCAM1 | Development Process | 23313552 |
| MIRT504464 | hsa-miR-145-5p | EID2B | Development Process | 23446348 |
| MIRT504466 | hsa-miR-205-5p | EID2B | Development Process | 23446348 |
| MIRT504470 | hsa-miR-92a-3p | EID2B | Development Process | 22473208 |
| MIRT504470 | hsa-miR-92a-3p | EID2B | Development Process | 23446348 |
| MIRT508038 | hsa-miR-195-5p | AXIN2 | Embryo Development  | 23446348 |
| MIRT508038 | hsa-miR-195-5p | AXIN2 | Embryo Development  | 21572407 |
| MIRT508038 | hsa-miR-195-5p | AXIN2 | Embryo Development  | 20371350 |
| MIRT508041 | hsa-miR-15a-5p | AXIN2 | Embryo Development  | 23446348 |
| MIRT508041 | hsa-miR-15a-5p | AXIN2 | Embryo Development  | 21572407 |
| MIRT508041 | hsa-miR-15a-5p | AXIN2 | Embryo Development  | 20371350 |
| MIRT508642 | hsa-miR-195-5p | CASK  | Cytokinesis         | 23446348 |
| MIRT508642 | hsa-miR-195-5p | CASK  | Cytokinesis         | 22927820 |
| MIRT508642 | hsa-miR-195-5p | CASK  | Cytokinesis         | 27292025 |

|            |                 |        |                      |          |
|------------|-----------------|--------|----------------------|----------|
| MIRT508642 | hsa-miR-195-5p  | CASK   | Cytokinesis          | 27418678 |
| MIRT508642 | hsa-miR-195-5p  | CASK   | Cytokinesis          | 28735896 |
| MIRT508643 | hsa-miR-15b-5p  | CASK   | Cytokinesis          | 23446348 |
| MIRT508643 | hsa-miR-15b-5p  | CASK   | Cytokinesis          | 22927820 |
| MIRT508643 | hsa-miR-15b-5p  | CASK   | Cytokinesis          | 27292025 |
| MIRT508643 | hsa-miR-15b-5p  | CASK   | Cytokinesis          | 27418678 |
| MIRT508643 | hsa-miR-15b-5p  | CASK   | Cytokinesis          | 28735896 |
| MIRT508644 | hsa-miR-15a-5p  | CASK   | Cytokinesis          | 23446348 |
| MIRT508644 | hsa-miR-15a-5p  | CASK   | Cytokinesis          | 22927820 |
| MIRT508644 | hsa-miR-15a-5p  | CASK   | Cytokinesis          | 27292025 |
| MIRT508644 | hsa-miR-15a-5p  | CASK   | Cytokinesis          | 27418678 |
| MIRT508644 | hsa-miR-15a-5p  | CASK   | Cytokinesis          | 28735896 |
| MIRT509521 | hsa-miR-151a-3p | INTU   | Embryo Development   | 23446348 |
| MIRT509521 | hsa-miR-151a-3p | INTU   | Embryo Development   | 22012620 |
| MIRT509521 | hsa-miR-151a-3p | INTU   | Embryo Development   | 21572407 |
| MIRT509521 | hsa-miR-151a-3p | INTU   | Embryo Development   | 20371350 |
| MIRT511895 | hsa-miR-152-3p  | GAS1   | Development Process  | 23446348 |
| MIRT511895 | hsa-miR-152-3p  | GAS1   | Development Process  | 21572407 |
| MIRT511895 | hsa-miR-152-3p  | GAS1   | Development Process  | 20371350 |
| MIRT515266 | hsa-miR-197-3p  | CSNK1E | Development Process  | 23446348 |
| MIRT515268 | hsa-miR-411-5p  | CSNK1E | Development Process  | 23446348 |
| MIRT515921 | hsa-miR-373-3p  | MFAP2  | Embryo Development   | 23446348 |
| MIRT515921 | hsa-miR-373-3p  | MFAP2  | Embryo Development   | 23824327 |
| MIRT515922 | hsa-miR-372-3p  | MFAP2  | Embryo Development   | 23446348 |
| MIRT515922 | hsa-miR-372-3p  | MFAP2  | Embryo Development   | 23824327 |
| MIRT515924 | hsa-miR-302d-3p | MFAP2  | Embryo Development   | 23446348 |
| MIRT515924 | hsa-miR-302d-3p | MFAP2  | Embryo Development   | 23824327 |
| MIRT517270 | hsa-miR-574-5p  | ANG    | Reproductive Process | 23446348 |
| MIRT517270 | hsa-miR-574-5p  | ANG    | Reproductive Process | 21572407 |
| MIRT517271 | hsa-miR-223-5p  | ANG    | Reproductive Process | 23446348 |
| MIRT517271 | hsa-miR-223-5p  | ANG    | Reproductive Process | 21572407 |
| MIRT517946 | hsa-miR-663a    | TRIM59 | Cytokinesis          | 23446348 |
| MIRT522973 | hsa-miR-150-5p  | INTU   | Embryo Development   | 23446348 |
| MIRT523846 | hsa-miR-574-5p  | ETV6   | Reproductive Process | 23446348 |
| MIRT523849 | hsa-miR-223-5p  | ETV6   | Reproductive Process | 23446348 |
| MIRT525720 | hsa-miR-202-3p  | SOD2   | Development Process  | 22012620 |
| MIRT525725 | hsa-let-7g-5p   | SOD2   | Development Process  | 22012620 |
| MIRT525726 | hsa-let-7f-5p   | SOD2   | Development Process  | 22012620 |
| MIRT525728 | hsa-let-7d-5p   | SOD2   | Development Process  | 22012620 |
| MIRT525729 | hsa-let-7c-5p   | SOD2   | Development Process  | 22012620 |

|            |                 |          |                      |          |
|------------|-----------------|----------|----------------------|----------|
| MIRT525730 | hsa-let-7b-5p   | SOD2     | Development Process  | 22012620 |
| MIRT525732 | hsa-let-7a-5p   | SOD2     | Development Process  | 22012620 |
| MIRT525736 | hsa-miR-518a-5p | SOD2     | Development Process  | 22012620 |
| MIRT525762 | hsa-miR-93-5p   | SOD2     | Development Process  | 22473208 |
| MIRT525762 | hsa-miR-93-5p   | SOD2     | Development Process  | 22012620 |
| MIRT525765 | hsa-miR-20b-5p  | SOD2     | Development Process  | 22473208 |
| MIRT525765 | hsa-miR-20b-5p  | SOD2     | Development Process  | 22012620 |
| MIRT525766 | hsa-miR-17-5p   | SOD2     | Development Process  | 22473208 |
| MIRT525766 | hsa-miR-17-5p   | SOD2     | Development Process  | 22012620 |
| MIRT525767 | hsa-miR-106a-5p | SOD2     | Development Process  | 22012620 |
| MIRT525811 | hsa-miR-885-5p  | SOD2     | Development Process  | 22012620 |
| MIRT527541 | hsa-miR-373-3p  | DLGAP5   | Cytokinesis          | 22012620 |
| MIRT527541 | hsa-miR-373-3p  | DLGAP5   | Cytokinesis          | 21572407 |
| MIRT527542 | hsa-miR-372-3p  | DLGAP5   | Cytokinesis          | 22012620 |
| MIRT527542 | hsa-miR-372-3p  | DLGAP5   | Cytokinesis          | 21572407 |
| MIRT527544 | hsa-miR-302d-3p | DLGAP5   | Cytokinesis          | 22012620 |
| MIRT527544 | hsa-miR-302d-3p | DLGAP5   | Cytokinesis          | 21572407 |
| MIRT527646 | hsa-miR-21-5p   | ORC4     | Cytokinesis          | 22012620 |
| MIRT527674 | hsa-miR-29c-3p  | CASP8    | Embryo Development   | 22012620 |
| MIRT527675 | hsa-miR-29b-3p  | CASP8    | Embryo Development   | 22012620 |
| MIRT527676 | hsa-miR-29a-3p  | CASP8    | Embryo Development   | 22012620 |
| MIRT528382 | hsa-miR-205-5p  | TRAF3IP1 | Embryo Development   | 22012620 |
| MIRT534192 | hsa-miR-92a-3p  | SLC7A11  | Development Process  | 22473208 |
| MIRT534192 | hsa-miR-92a-3p  | SLC7A11  | Development Process  | 22012620 |
| MIRT534196 | hsa-miR-223-5p  | SLC7A11  | Development Process  | 22012620 |
| MIRT534196 | hsa-miR-223-5p  | SLC7A11  | Development Process  | 20371350 |
| MIRT534196 | hsa-miR-223-5p  | SLC7A11  | Development Process  | 23313552 |
| MIRT534196 | hsa-miR-223-5p  | SLC7A11  | Development Process  | 21572407 |
| MIRT536445 | hsa-miR-93-5p   | KMT2B    | Reproductive Process | 22012620 |
| MIRT536445 | hsa-miR-93-5p   | KMT2B    | Reproductive Process | 21572407 |
| MIRT536445 | hsa-miR-93-5p   | KMT2B    | Reproductive Process | 20371350 |
| MIRT536446 | hsa-miR-20a-5p  | KMT2B    | Reproductive Process | 22012620 |
| MIRT536446 | hsa-miR-20a-5p  | KMT2B    | Reproductive Process | 21572407 |
| MIRT536446 | hsa-miR-20a-5p  | KMT2B    | Reproductive Process | 20371350 |
| MIRT536447 | hsa-miR-17-5p   | KMT2B    | Reproductive Process | 22012620 |
| MIRT536447 | hsa-miR-17-5p   | KMT2B    | Reproductive Process | 21572407 |
| MIRT536447 | hsa-miR-17-5p   | KMT2B    | Reproductive Process | 20371350 |
| MIRT536448 | hsa-miR-106b-5p | KMT2B    | Reproductive Process | 22012620 |
| MIRT536448 | hsa-miR-106b-5p | KMT2B    | Reproductive Process | 21572407 |
| MIRT536448 | hsa-miR-106b-5p | KMT2B    | Reproductive Process | 20371350 |



|            |                 |        |                      |          |
|------------|-----------------|--------|----------------------|----------|
| MIRT536449 | hsa-miR-106a-5p | KMT2B  | Reproductive Process | 22012620 |
| MIRT536449 | hsa-miR-106a-5p | KMT2B  | Reproductive Process | 21572407 |
| MIRT536449 | hsa-miR-106a-5p | KMT2B  | Reproductive Process | 20371350 |
| MIRT536450 | hsa-miR-20b-5p  | KMT2B  | Reproductive Process | 22012620 |
| MIRT536450 | hsa-miR-20b-5p  | KMT2B  | Reproductive Process | 21572407 |
| MIRT536450 | hsa-miR-20b-5p  | KMT2B  | Reproductive Process | 20371350 |
| MIRT536454 | hsa-miR-382-5p  | KLHL3  | Development Process  | 22012620 |
| MIRT537930 | hsa-miR-103a-3p | DST    | Cytokinesis          | 22012620 |
| MIRT542124 | hsa-miR-150-5p  | DIS3L  | Cytokinesis          | 21572407 |
| MIRT542134 | hsa-miR-373-3p  | DIS3L  | Cytokinesis          | 21572407 |
| MIRT542134 | hsa-miR-373-3p  | DIS3L  | Cytokinesis          | 27292025 |
| MIRT542135 | hsa-miR-372-3p  | DIS3L  | Cytokinesis          | 21572407 |
| MIRT542135 | hsa-miR-372-3p  | DIS3L  | Cytokinesis          | 27292025 |
| MIRT542137 | hsa-miR-302d-3p | DIS3L  | Cytokinesis          | 21572407 |
| MIRT542137 | hsa-miR-302d-3p | DIS3L  | Cytokinesis          | 27292025 |
| MIRT542141 | hsa-miR-93-5p   | DIS3L  | Cytokinesis          | 21572407 |
| MIRT542141 | hsa-miR-93-5p   | DIS3L  | Cytokinesis          | 27292025 |
| MIRT542144 | hsa-miR-20b-5p  | DIS3L  | Cytokinesis          | 21572407 |
| MIRT542144 | hsa-miR-20b-5p  | DIS3L  | Cytokinesis          | 27292025 |
| MIRT542145 | hsa-miR-20a-5p  | DIS3L  | Cytokinesis          | 21572407 |
| MIRT542145 | hsa-miR-20a-5p  | DIS3L  | Cytokinesis          | 27292025 |
| MIRT542146 | hsa-miR-17-5p   | DIS3L  | Cytokinesis          | 21572407 |
| MIRT542146 | hsa-miR-17-5p   | DIS3L  | Cytokinesis          | 27292025 |
| MIRT542147 | hsa-miR-106b-5p | DIS3L  | Cytokinesis          | 21572407 |
| MIRT542147 | hsa-miR-106b-5p | DIS3L  | Cytokinesis          | 27292025 |
| MIRT542148 | hsa-miR-106a-5p | DIS3L  | Cytokinesis          | 21572407 |
| MIRT542148 | hsa-miR-106a-5p | DIS3L  | Cytokinesis          | 27292025 |
| MIRT543882 | hsa-miR-223-5p  | AIMP1  | Development Process  | 21572407 |
| MIRT548130 | hsa-miR-203a-3p | GAS1   | Development Process  | 21572407 |
| MIRT548132 | hsa-miR-500a-5p | GAS1   | Development Process  | 21572407 |
| MIRT548417 | hsa-miR-103a-3p | EML4   | Cytokinesis          | 21572407 |
| MIRT548417 | hsa-miR-103a-3p | EML4   | Cytokinesis          | 20371350 |
| MIRT548874 | hsa-miR-411-5p  | CEP55  | Development Process  | 21572407 |
| MIRT548874 | hsa-miR-411-5p  | CEP55  | Development Process  | 20371350 |
| MIRT549232 | hsa-miR-499a-5p | AXIN2  | Embryo Development   | 21572407 |
| MIRT549233 | hsa-miR-208b-3p | AXIN2  | Embryo Development   | 21572407 |
| MIRT550319 | hsa-miR-574-5p  | SMAD9  | Development Process  | 21572407 |
| MIRT550324 | hsa-miR-223-5p  | SMAD9  | Development Process  | 21572407 |
| MIRT550430 | hsa-miR-940     | ORC4   | Cytokinesis          | 21572407 |
| MIRT551462 | hsa-miR-23a-3p  | TRIM59 | Cytokinesis          | 21572407 |

|            |                 |         |                      |          |
|------------|-----------------|---------|----------------------|----------|
| MIRT553232 | hsa-miR-18a-5p  | TWF1    | Cytokinesis          | 21572407 |
| MIRT553233 | hsa-miR-18b-5p  | TWF1    | Cytokinesis          | 21572407 |
| MIRT553953 | hsa-miR-197-3p  | SS18    | Development Process  | 21572407 |
| MIRT555170 | hsa-miR-222-3p  | PTBP3   | Development Process  | 21572407 |
| MIRT555561 | hsa-miR-101-3p  | PLEKHA1 | Reproductive Process | 21572407 |
| MIRT558366 | hsa-miR-198     | DIDO1   | Cytokinesis          | 21572407 |
| MIRT558366 | hsa-miR-198     | DIDO1   | Cytokinesis          | 20371350 |
| MIRT558368 | hsa-miR-144-3p  | DIDO1   | Cytokinesis          | 21572407 |
| MIRT558368 | hsa-miR-144-3p  | DIDO1   | Cytokinesis          | 20371350 |
| MIRT558369 | hsa-miR-101-3p  | DIDO1   | Cytokinesis          | 21572407 |
| MIRT558369 | hsa-miR-101-3p  | DIDO1   | Cytokinesis          | 20371350 |
| MIRT558373 | hsa-miR-409-3p  | DIDO1   | Cytokinesis          | 21572407 |
| MIRT558373 | hsa-miR-409-3p  | DIDO1   | Cytokinesis          | 20371350 |
| MIRT558788 | hsa-miR-199a-3p | CEP55   | Development Process  | 21572407 |
| MIRT558927 | hsa-miR-223-5p  | CBX1    | Cytokinesis          | 21572407 |
| MIRT558935 | hsa-miR-93-5p   | CBX1    | Cytokinesis          | 21572407 |
| MIRT558938 | hsa-miR-20b-5p  | CBX1    | Cytokinesis          | 21572407 |
| MIRT558939 | hsa-miR-20a-5p  | CBX1    | Cytokinesis          | 21572407 |
| MIRT558940 | hsa-miR-17-5p   | CBX1    | Cytokinesis          | 21572407 |
| MIRT558941 | hsa-miR-106b-5p | CBX1    | Cytokinesis          | 21572407 |
| MIRT558942 | hsa-miR-106a-5p | CBX1    | Cytokinesis          | 21572407 |
| MIRT559273 | hsa-miR-1248    | B3GNT2  | Development Process  | 21572407 |
| MIRT559273 | hsa-miR-1248    | B3GNT2  | Development Process  | 20371350 |
| MIRT559277 | hsa-miR-183-5p  | B3GNT2  | Development Process  | 21572407 |
| MIRT559277 | hsa-miR-183-5p  | B3GNT2  | Development Process  | 20371350 |
| MIRT559796 | hsa-miR-181b-5p | ZNF415  | Cytokinesis          | 20371350 |
| MIRT559797 | hsa-miR-181a-5p | ZNF415  | Cytokinesis          | 20371350 |
| MIRT559930 | hsa-miR-7-5p    | SOD2    | Development Process  | 20371350 |
| MIRT561387 | hsa-miR-103a-3p | TWF1    | Cytokinesis          | 20371350 |
| MIRT562711 | hsa-miR-199a-5p | ZNF415  | Cytokinesis          | 20371350 |
| MIRT563320 | hsa-miR-376c-3p | ORC4    | Cytokinesis          | 20371350 |
| MIRT567225 | hsa-miR-215-5p  | ID4     | Reproductive Process | 20371350 |
| MIRT570516 | hsa-miR-574-5p  | SLC7A11 | Development Process  | 20371350 |
| MIRT570516 | hsa-miR-574-5p  | SLC7A11 | Development Process  | 21572407 |
| MIRT607626 | hsa-miR-574-5p  | TRIOBP  | Embryo Development   | 24906430 |
| MIRT607927 | hsa-miR-122-5p  | ANG     | Reproductive Process | 24906430 |
| MIRT609030 | hsa-miR-574-5p  | EP300   | Embryo Development   | 24906430 |
| MIRT609030 | hsa-miR-574-5p  | EP300   | Embryo Development   | 27418678 |
| MIRT609369 | hsa-miR-9-5p    | SOD2    | Development Process  | 23824327 |
| MIRT612153 | hsa-miR-125b-5p | SIX1    | Embryo Development   | 23824327 |

|            |                 |          |                      |          |
|------------|-----------------|----------|----------------------|----------|
| MIRT612153 | hsa-miR-125b-5p | SIX1     | Embryo Development   | 19536157 |
| MIRT612153 | hsa-miR-125b-5p | SIX1     | Embryo Development   | 27418678 |
| MIRT612154 | hsa-miR-125a-5p | SIX1     | Embryo Development   | 23824327 |
| MIRT612154 | hsa-miR-125a-5p | SIX1     | Embryo Development   | 19536157 |
| MIRT612154 | hsa-miR-125a-5p | SIX1     | Embryo Development   | 27418678 |
| MIRT612819 | hsa-miR-601     | KLHL3    | Development Process  | 23824327 |
| MIRT613136 | hsa-miR-145-5p  | DUSP6    | Development Process  | 23824327 |
| MIRT615941 | hsa-miR-378a-5p | SORD     | Reproductive Process | 23824327 |
| MIRT620859 | hsa-miR-4772-3p | SERPING1 | Development Process  | 23824327 |
| MIRT623904 | hsa-miR-1248    | FO XK2   | Development Process  | 23824327 |
| MIRT624076 | hsa-miR-129-5p  | EBF1     | Development Process  | 23824327 |
| MIRT624076 | hsa-miR-129-5p  | EBF1     | Development Process  | 27418678 |
| MIRT625499 | hsa-miR-940     | SMAD9    | Development Process  | 23824327 |
| MIRT626269 | hsa-miR-330-5p  | EPHB3    | Development Process  | 23824327 |
| MIRT626269 | hsa-miR-330-5p  | EPHB3    | Development Process  | 19536157 |
| MIRT626270 | hsa-miR-326     | EPHB3    | Development Process  | 23824327 |
| MIRT626270 | hsa-miR-326     | EPHB3    | Development Process  | 19536157 |
| MIRT626362 | hsa-miR-4772-3p | DIS3L    | Cytokinesis          | 23824327 |
| MIRT628683 | hsa-miR-24-3p   | TRAF3IP1 | Embryo Development   | 23824327 |
| MIRT630219 | hsa-miR-24-3p   | SORD     | Reproductive Process | 23824327 |
| MIRT630232 | hsa-miR-152-3p  | SORD     | Reproductive Process | 23824327 |
| MIRT630238 | hsa-miR-216a-5p | SORD     | Reproductive Process | 23824327 |
| MIRT640564 | hsa-miR-182-5p  | CPE      | Development Process  | 23824327 |
| MIRT640568 | hsa-miR-24-3p   | CPE      | Development Process  | 23824327 |
| MIRT640575 | hsa-miR-1972    | CPE      | Development Process  | 23824327 |
| MIRT640646 | hsa-miR-429     | IGF2     | Embryo Development   | 23824327 |
| MIRT640647 | hsa-miR-200c-3p | IGF2     | Embryo Development   | 23824327 |
| MIRT640649 | hsa-miR-200b-3p | IGF2     | Embryo Development   | 23824327 |
| MIRT641421 | hsa-miR-128-3p  | SERPING1 | Development Process  | 23824327 |
| MIRT642822 | hsa-miR-23a-3p  | SOD2     | Development Process  | 23824327 |
| MIRT643598 | hsa-miR-150-5p  | SPAG16   | Reproductive Process | 23824327 |
| MIRT649030 | hsa-miR-500a-5p | SLC1A2   | Development Process  | 23824327 |
| MIRT649055 | hsa-miR-663a    | SLC1A2   | Development Process  | 23824327 |
| MIRT653254 | hsa-miR-1248    | SORD     | Reproductive Process | 23824327 |
| MIRT655608 | hsa-miR-215-5p  | ORC4     | Cytokinesis          | 23824327 |
| MIRT655609 | hsa-miR-192-5p  | ORC4     | Cytokinesis          | 23824327 |
| MIRT655612 | hsa-miR-145-5p  | ORC4     | Cytokinesis          | 23824327 |
| MIRT655612 | hsa-miR-145-5p  | ORC4     | Cytokinesis          | 27292025 |
| MIRT655813 | hsa-miR-195-5p  | NOTCH2   | Development Process  | 22473208 |
| MIRT655813 | hsa-miR-195-5p  | NOTCH2   | Development Process  | 23824327 |

|            |                 |         |                      |          |
|------------|-----------------|---------|----------------------|----------|
| MIRT655814 | hsa-miR-15b-5p  | NOTCH2  | Development Process  | 22473208 |
| MIRT655814 | hsa-miR-15b-5p  | NOTCH2  | Development Process  | 23824327 |
| MIRT655815 | hsa-miR-15a-5p  | NOTCH2  | Development Process  | 22473208 |
| MIRT655815 | hsa-miR-15a-5p  | NOTCH2  | Development Process  | 23824327 |
| MIRT668298 | hsa-miR-940     | FOSL2   | Development Process  | 23824327 |
| MIRT668298 | hsa-miR-940     | FOSL2   | Development Process  | 19536157 |
| MIRT668302 | hsa-miR-133a-3p | FOSL2   | Development Process  | 23824327 |
| MIRT668310 | hsa-miR-133b    | FOSL2   | Development Process  | 23824327 |
| MIRT670996 | hsa-miR-24-3p   | PTGIS   | Reproductive Process | 23824327 |
| MIRT671040 | hsa-miR-24-3p   | SS18    | Development Process  | 23824327 |
| MIRT671574 | hsa-miR-24-3p   | FOSL2   | Development Process  | 23824327 |
| MIRT673600 | hsa-miR-26a-5p  | HPSE    | Development Process  | 23824327 |
| MIRT673600 | hsa-miR-26a-5p  | HPSE    | Development Process  | 23313552 |
| MIRT673609 | hsa-miR-4772-3p | HPSE    | Development Process  | 23824327 |
| MIRT673629 | hsa-miR-24-3p   | PPM1D   | Cytokinesis          | 23824327 |
| MIRT674099 | hsa-miR-143-3p  | PLEKHA1 | Reproductive Process | 23824327 |
| MIRT674571 | hsa-miR-24-3p   | KIF3A   | Development Process  | 23824327 |
| MIRT675483 | hsa-miR-24-3p   | SLC1A2  | Development Process  | 23824327 |
| MIRT675483 | hsa-miR-24-3p   | SLC1A2  | Development Process  | 23313552 |
| MIRT676625 | hsa-miR-150-5p  | CSNK1E  | Development Process  | 23824327 |
| MIRT680942 | hsa-miR-940     | EVC     | Development Process  | 23706177 |
| MIRT682667 | hsa-miR-940     | CASP8   | Embryo Development   | 23706177 |
| MIRT683772 | hsa-miR-940     | CPE     | Development Process  | 23313552 |
| MIRT685941 | hsa-miR-150-5p  | PTGIS   | Reproductive Process | 23313552 |
| MIRT685960 | hsa-miR-373-3p  | PTGIS   | Reproductive Process | 23313552 |
| MIRT685961 | hsa-miR-372-3p  | PTGIS   | Reproductive Process | 23313552 |
| MIRT685963 | hsa-miR-302d-3p | PTGIS   | Reproductive Process | 23313552 |
| MIRT685967 | hsa-miR-93-5p   | PTGIS   | Reproductive Process | 23313552 |
| MIRT685970 | hsa-miR-20b-5p  | PTGIS   | Reproductive Process | 23313552 |
| MIRT685971 | hsa-miR-20a-5p  | PTGIS   | Reproductive Process | 23313552 |
| MIRT685972 | hsa-miR-17-5p   | PTGIS   | Reproductive Process | 23313552 |
| MIRT685973 | hsa-miR-106b-5p | PTGIS   | Reproductive Process | 23313552 |
| MIRT685974 | hsa-miR-106a-5p | PTGIS   | Reproductive Process | 23313552 |
| MIRT686480 | hsa-miR-1254    | TRIOBP  | Embryo Development   | 23313552 |
| MIRT686484 | hsa-miR-150-5p  | TRIOBP  | Embryo Development   | 23313552 |
| MIRT686496 | hsa-miR-373-3p  | TRIOBP  | Embryo Development   | 23313552 |
| MIRT686497 | hsa-miR-372-3p  | TRIOBP  | Embryo Development   | 23313552 |
| MIRT686499 | hsa-miR-302d-3p | TRIOBP  | Embryo Development   | 23313552 |
| MIRT686503 | hsa-miR-17-5p   | TRIOBP  | Embryo Development   | 23313552 |
| MIRT686504 | hsa-miR-20a-5p  | TRIOBP  | Embryo Development   | 23313552 |

|            |                 |          |                      |          |
|------------|-----------------|----------|----------------------|----------|
| MIRT686507 | hsa-miR-106b-5p | TRIOBP   | Embryo Development   | 23313552 |
| MIRT686508 | hsa-miR-20b-5p  | TRIOBP   | Embryo Development   | 23313552 |
| MIRT686509 | hsa-miR-106a-5p | TRIOBP   | Embryo Development   | 23313552 |
| MIRT686510 | hsa-miR-93-5p   | TRIOBP   | Embryo Development   | 23313552 |
| MIRT686821 | hsa-miR-150-5p  | SLC7A11  | Development Process  | 23313552 |
| MIRT686832 | hsa-miR-373-3p  | SLC7A11  | Development Process  | 23313552 |
| MIRT686833 | hsa-miR-372-3p  | SLC7A11  | Development Process  | 23313552 |
| MIRT686835 | hsa-miR-302d-3p | SLC7A11  | Development Process  | 23313552 |
| MIRT686839 | hsa-miR-93-5p   | SLC7A11  | Development Process  | 23313552 |
| MIRT686842 | hsa-miR-20b-5p  | SLC7A11  | Development Process  | 23313552 |
| MIRT686843 | hsa-miR-20a-5p  | SLC7A11  | Development Process  | 23313552 |
| MIRT686844 | hsa-miR-17-5p   | SLC7A11  | Development Process  | 23313552 |
| MIRT686845 | hsa-miR-106b-5p | SLC7A11  | Development Process  | 23313552 |
| MIRT686846 | hsa-miR-106a-5p | SLC7A11  | Development Process  | 23313552 |
| MIRT690898 | hsa-miR-203a-3p | TOP2A    | Embryo Development   | 23313552 |
| MIRT696580 | hsa-miR-940     | TTC21B   | Development Process  | 23313552 |
| MIRT698675 | hsa-miR-181b-5p | TEF      | Development Process  | 23313552 |
| MIRT698676 | hsa-miR-181a-5p | TEF      | Development Process  | 23313552 |
| MIRT702806 | hsa-miR-183-5p  | HPSE     | Development Process  | 23313552 |
| MIRT704098 | hsa-miR-140-5p  | DST      | Cytokinesis          | 23313552 |
| MIRT704532 | hsa-miR-518a-5p | CNEP1R1  | Cytokinesis          | 23313552 |
| MIRT704541 | hsa-miR-144-3p  | CNEP1R1  | Cytokinesis          | 23313552 |
| MIRT704542 | hsa-miR-101-3p  | CNEP1R1  | Cytokinesis          | 23313552 |
| MIRT705555 | hsa-miR-423-5p  | ARID5B   | Reproductive Process | 23313552 |
| MIRT707502 | hsa-miR-10b-5p  | AXL      | Reproductive Process | 21572407 |
| MIRT707503 | hsa-miR-10a-5p  | AXL      | Reproductive Process | 21572407 |
| MIRT715359 | hsa-miR-181b-5p | VCAM1    | Development Process  | 19536157 |
| MIRT715363 | hsa-miR-181a-5p | VCAM1    | Development Process  | 19536157 |
| MIRT716825 | hsa-miR-142-3p  | PSME4    | Reproductive Process | 19536157 |
| MIRT717316 | hsa-miR-22-3p   | TRAF3IP1 | Embryo Development   | 19536157 |
| MIRT718465 | hsa-miR-484     | EED      | Development Process  | 19536157 |
| MIRT719013 | hsa-miR-486-5p  | HPGD     | Reproductive Process | 19536157 |
| MIRT723985 | hsa-miR-134-5p  | SOX17    | Embryo Development   | 19536157 |
| MIRT724577 | hsa-miR-1248    | NOTCH2   | Development Process  | 19536157 |
| MIRT726208 | hsa-miR-30e-5p  | TWF1     | Cytokinesis          | 22473208 |
| MIRT726209 | hsa-miR-30d-5p  | TWF1     | Cytokinesis          | 22473208 |
| MIRT726210 | hsa-miR-30b-5p  | TWF1     | Cytokinesis          | 22473208 |
| MIRT726212 | hsa-miR-20b-5p  | TWF1     | Cytokinesis          | 22473208 |
| MIRT726213 | hsa-miR-93-5p   | TWF1     | Cytokinesis          | 22473208 |
| MIRT726214 | hsa-miR-17-5p   | TWF1     | Cytokinesis          | 22473208 |

|            |                 |          |                      |          |
|------------|-----------------|----------|----------------------|----------|
| MIRT726782 | hsa-miR-19a-3p  | RASSF2   | Development Process  | 22473208 |
| MIRT727160 | hsa-miR-181a-5p | MPP5     | Development Process  | 22473208 |
| MIRT727161 | hsa-miR-181b-5p | MPP5     | Development Process  | 22473208 |
| MIRT727333 | hsa-miR-19b-3p  | KLHL3    | Development Process  | 22473208 |
| MIRT727334 | hsa-miR-19a-3p  | KLHL3    | Development Process  | 22473208 |
| MIRT727350 | hsa-miR-19b-3p  | KIF3A    | Development Process  | 22473208 |
| MIRT727351 | hsa-miR-19a-3p  | KIF3A    | Development Process  | 22473208 |
| MIRT727469 | hsa-miR-27a-3p  | IER3     | Development Process  | 22473208 |
| MIRT727471 | hsa-miR-93-5p   | IER3     | Development Process  | 22473208 |
| MIRT727472 | hsa-miR-20b-5p  | IER3     | Development Process  | 22473208 |
| MIRT727473 | hsa-miR-17-5p   | IER3     | Development Process  | 22473208 |
| MIRT727795 | hsa-miR-30e-5p  | EED      | Development Process  | 22473208 |
| MIRT727796 | hsa-miR-30d-5p  | EED      | Development Process  | 22473208 |
| MIRT727797 | hsa-miR-30b-5p  | EED      | Development Process  | 22473208 |
| MIRT727798 | hsa-miR-30a-5p  | EED      | Development Process  | 22473208 |
| MIRT727801 | hsa-miR-181b-5p | EED      | Development Process  | 22473208 |
| MIRT727802 | hsa-miR-181a-5p | EED      | Development Process  | 22473208 |
| MIRT727967 | hsa-miR-93-5p   | CNOT7    | Cytokinesis          | 22473208 |
| MIRT727969 | hsa-miR-20b-5p  | CNOT7    | Cytokinesis          | 22473208 |
| MIRT727970 | hsa-miR-17-5p   | CNOT7    | Cytokinesis          | 22473208 |
| MIRT731262 | hsa-miR-129-5p  | NR4A2    | Development Process  | 26824182 |
| MIRT731425 | hsa-miR-130b-3p | DLL1     | Embryo Development   | 28163094 |
| MIRT731579 | hsa-miR-376c-3p | NR5A2    | Embryo Development   | 27049310 |
| MIRT731625 | hsa-miR-125a-5p | STAT3    | Reproductive Process | 26389681 |
| MIRT731661 | hsa-miR-223-3p  | MYL9     | Cytokinesis          | 27121304 |
| MIRT732023 | hsa-miR-146a-5p | NOTCH2   | Development Process  | 27832663 |
| MIRT732023 | hsa-miR-146a-5p | NOTCH2   | Development Process  | 28278511 |
| MIRT732023 | hsa-miR-146a-5p | NOTCH2   | Development Process  | 26165719 |
| MIRT732307 | hsa-miR-181b-5p | SPP1     | Reproductive Process | 27192552 |
| MIRT732491 | hsa-miR-206     | NR4A2    | Development Process  | 25452104 |
| MIRT732527 | hsa-miR-483-5p  | CKB      | Development Process  | 25601461 |
| MIRT732533 | hsa-miR-34a-5p  | ANK3     | Development Process  | 25623948 |
| MIRT732553 | hsa-miR-223-3p  | STAT3    | Reproductive Process | 26348153 |
| MIRT732567 | hsa-miR-103a-3p | SFRP4    | Development Process  | 25820527 |
| MIRT732605 | hsa-let-7c-5p   | STAT3    | Reproductive Process | 26851791 |
| MIRT732901 | hsa-miR-23a-3p  | STAT3    | Reproductive Process | 26314966 |
| MIRT732968 | hsa-miR-206     | TWF1     | Cytokinesis          | 27435395 |
| MIRT733075 | hsa-miR-130a-3p | PPARGC1A | Development Process  | 25595716 |
| MIRT733233 | hsa-miR-338-5p  | EFEMP1   | Embryo Development   | 28292024 |
| MIRT733293 | hsa-miR-93-5p   | ANG      | Reproductive Process | 28401709 |

|            |                 |         |                      |          |
|------------|-----------------|---------|----------------------|----------|
| MIRT733520 | hsa-miR-128-3p  | RICTOR  | Embryo Development   | 27893811 |
| MIRT733602 | hsa-miR-106a-5p | MYB     | Development Process  | 26265888 |
| MIRT733738 | hsa-miR-335-5p  | DKK1    | Embryo Development   | 26986081 |
| MIRT733978 | hsa-miR-34a-5p  | CASP8   | Embryo Development   | 28097098 |
| MIRT733985 | hsa-miR-34a-5p  | GADD45A | Cytokinesis          | 28097098 |
| MIRT734098 | hsa-miR-101-3p  | SRF     | Embryo Development   | 28251884 |
| MIRT734265 | hsa-miR-9-5p    | HES1    | Embryo Development   | 27426040 |
| MIRT734266 | hsa-miR-9-5p    | NOTCH2  | Development Process  | 27426040 |
| MIRT734349 | hsa-miR-29b-3p  | STAT3   | Reproductive Process | 26175849 |
| MIRT734426 | hsa-miR-191-5p  | NOTCH2  | Development Process  | 25992613 |
| MIRT734721 | hsa-let-7a-5p   | STAT3   | Reproductive Process | 27932893 |
| MIRT734758 | hsa-let-7f-5p   | POSTN   | Development Process  | 25735962 |
| MIRT734824 | hsa-miR-152-3p  | DKK1    | Embryo Development   | 26400224 |
| MIRT734902 | hsa-miR-34a-5p  | NR4A2   | Development Process  | 27121375 |
| MIRT734916 | hsa-miR-10a-5p  | BCL6    | Reproductive Process | 26590574 |
| MIRT735023 | hsa-miR-9-5p    | DKK1    | Embryo Development   | 27393149 |
| MIRT735039 | hsa-miR-34a-5p  | DGKZ    | Cytokinesis          | 28008152 |
| MIRT735060 | hsa-miR-31-5p   | SLC1A2  | Development Process  | 27995756 |
| MIRT735061 | hsa-miR-200c-3p | SLC1A2  | Development Process  | 27995756 |
| MIRT735175 | hsa-miR-29a-5p  | DKK1    | Embryo Development   | 25846459 |
| MIRT735309 | hsa-miR-21-5p   | CASP8   | Embryo Development   | 26080425 |
| MIRT736096 | hsa-miR-1225-3p | GDF15   | Development Process  | 26701625 |
| MIRT736107 | hsa-miR-122-5p  | H1F0    | Cytokinesis          | 26701625 |
| MIRT736182 | hsa-miR-1228-5p | CLU     | Development Process  | 26701625 |
| MIRT736558 | hsa-miR-1254    | CLU     | Development Process  | 26701625 |
| MIRT737007 | hsa-miR-128-3p  | GDF15   | Development Process  | 26701625 |
| MIRT737933 | hsa-miR-15a-5p  | CLU     | Development Process  | 26701625 |
| MIRT737955 | hsa-miR-15b-5p  | CLU     | Development Process  | 26701625 |
| MIRT737983 | hsa-miR-16-5p   | CLU     | Development Process  | 26701625 |
| MIRT738034 | hsa-miR-181b-5p | H1F0    | Cytokinesis          | 26701625 |
| MIRT738622 | hsa-miR-195-5p  | CLU     | Development Process  | 26701625 |
| MIRT738675 | hsa-miR-1972    | LIF     | Embryo Development   | 26701625 |
| MIRT738675 | hsa-miR-1972    | LIF     | Embryo Development   | 28735896 |
| MIRT738995 | hsa-miR-214-3p  | KMT2B   | Reproductive Process | 26701625 |
| MIRT739231 | hsa-miR-24-3p   | RRAS    | Development Process  | 26701625 |
| MIRT740494 | hsa-miR-31-5p   | KMT2B   | Reproductive Process | 26701625 |
| MIRT741267 | hsa-miR-326     | CLU     | Development Process  | 26701625 |
| MIRT741325 | hsa-miR-330-5p  | CLU     | Development Process  | 26701625 |
| MIRT741433 | hsa-miR-34a-5p  | CRABP2  | Embryo Development   | 26701625 |
| MIRT743258 | hsa-miR-423-5p  | KMT2B   | Reproductive Process | 26701625 |

|            |                 |          |                      |          |
|------------|-----------------|----------|----------------------|----------|
| MIRT748686 | hsa-miR-4772-3p | CXCL14   | Development Process  | 26701625 |
| MIRT748686 | hsa-miR-4772-3p | CXCL14   | Development Process  | 27418678 |
| MIRT748686 | hsa-miR-4772-3p | CXCL14   | Development Process  | 28735896 |
| MIRT760846 | hsa-miR-940     | SRF      | Embryo Development   | 26701625 |
| MIRT761361 | hsa-miR-122-5p  | VWC2     | Development Process  | 27292025 |
| MIRT761598 | hsa-miR-1248    | MFAP5    | Development Process  | 27292025 |
| MIRT762106 | hsa-miR-127-3p  | COTL1    | Cytokinesis          | 27292025 |
| MIRT762867 | hsa-miR-150-5p  | KIF3A    | Development Process  | 27292025 |
| MIRT764292 | hsa-miR-26a-5p  | EID2B    | Development Process  | 27292025 |
| MIRT764295 | hsa-miR-26a-5p  | KIF3A    | Development Process  | 27292025 |
| MIRT772886 | hsa-miR-499a-5p | TRAF3IP1 | Embryo Development   | 27292025 |
| MIRT782903 | hsa-miR-940     | KIF3A    | Development Process  | 27292025 |
| MIRT782959 | hsa-miR-940     | VCAM1    | Development Process  | 27292025 |
| MIRT783223 | hsa-miR-1254    | KLHL3    | Development Process  | 27418678 |
| MIRT783462 | hsa-miR-129-5p  | CEP126   | Cytokinesis          | 27418678 |
| MIRT783480 | hsa-miR-129-5p  | EP300    | Embryo Development   | 27418678 |
| MIRT783605 | hsa-miR-129-5p  | STAR     | Reproductive Process | 27418678 |
| MIRT783607 | hsa-miR-129-5p  | TAGLN    | Development Process  | 27418678 |
| MIRT783818 | hsa-miR-143-3p  | STAR     | Reproductive Process | 27418678 |
| MIRT783999 | hsa-miR-18a-5p  | KLHL3    | Development Process  | 27418678 |
| MIRT784002 | hsa-miR-18b-5p  | KLHL3    | Development Process  | 27418678 |
| MIRT784361 | hsa-miR-26a-5p  | EP300    | Embryo Development   | 27418678 |
| MIRT785511 | hsa-miR-411-5p  | INTU     | Embryo Development   | 27418678 |
| MIRT787194 | hsa-miR-518a-5p | CXCL14   | Development Process  | 27418678 |
| MIRT787194 | hsa-miR-518a-5p | CXCL14   | Development Process  | 28735896 |
| MIRT790710 | hsa-miR-518a-5p | CPE      | Development Process  | 28735896 |
