# Supplementary material for: Development of a Novel Endometrial Signature Based on Endometrial microRNA for Determining the Optimal Timing for Embryo Transfer
Source: MDPI journal article supplement (doi:10.3390/biomedicines12030700), 2024-03-21
Supplement: s1 [file s1]

**Supplemental Table S1. Multiple group comparison for characteristics of patients at the time of biopsy.**

Multiple group comparison (Training & Testing set, N = 150)

| Age                                                           | Post hoc test (p-value)<br>Bonferroni | Multiple group test (p-value)<br>Kruskal Wallis |
|---------------------------------------------------------------|---------------------------------------|-------------------------------------------------|
| 108±5hrs vs 120±5hrs                                          | 0.6505                                | 0.0107                                          |
| 108±5hrs vs 144±5hrs                                          | 0.0072                                |                                                 |
| 120±5hrs vs 144±5hrs                                          | 0.0204                                |                                                 |
| No. of previous implantation failure                          | Post hoc test (p-value)<br>Bonferroni | Multiple group test<br>Kruskal Wallis           |
| 108±5hrs vs 120±5hrs                                          | 0.0085                                | 0.0361                                          |
| 108±5hrs vs 144±5hrs                                          | 0.0313                                |                                                 |
| 120±5hrs vs 144±5hrs                                          | 1                                     |                                                 |
| P4 Level (ng/ml) before exogenous progesterone administration | Post hoc test (p-value)<br>Bonferroni | Multiple group test<br>Kruskal Wallis           |
| 108±5hrs vs 120±5hrs                                          | 0.045                                 | 0.6122                                          |
| 108±5hrs vs 144±5hrs                                          | 0.389                                 |                                                 |
| 120±5hrs vs 144±5hrs                                          | 1                                     |                                                 |
| Body mass index (BMI)                                         | Post hoc test (p-value)<br>Bonferroni | Multiple group test<br>Kruskal Wallis           |
| 108±5hrs vs 120±5hrs                                          | 0.72                                  | 0.4156                                          |
| 108±5hrs vs 144±5hrs                                          | 0.69                                  |                                                 |
| 120±5hrs vs 144±5hrs                                          | 1                                     |                                                 |
| Endometrial thickness (mm)                                    | Post hoc test (p-value)<br>Bonferroni | Multiple group test<br>Kruskal Wallis           |
| 108±5hrs vs 120±5hrs                                          | 0.93                                  | 0.3032                                          |
| 108±5hrs vs 144±5hrs                                          | 1                                     |                                                 |
| 120±5hrs vs 144±5hrs                                          | 1                                     |                                                 |
