# Supplementary figures and images for: Development of a Novel Endometrial Signature Based on Endometrial microRNA for Determining the Optimal Timing for Embryo Transfer
Source: MDPI journal article supplement (doi:10.3390/biomedicines12030700), 2024-03-21

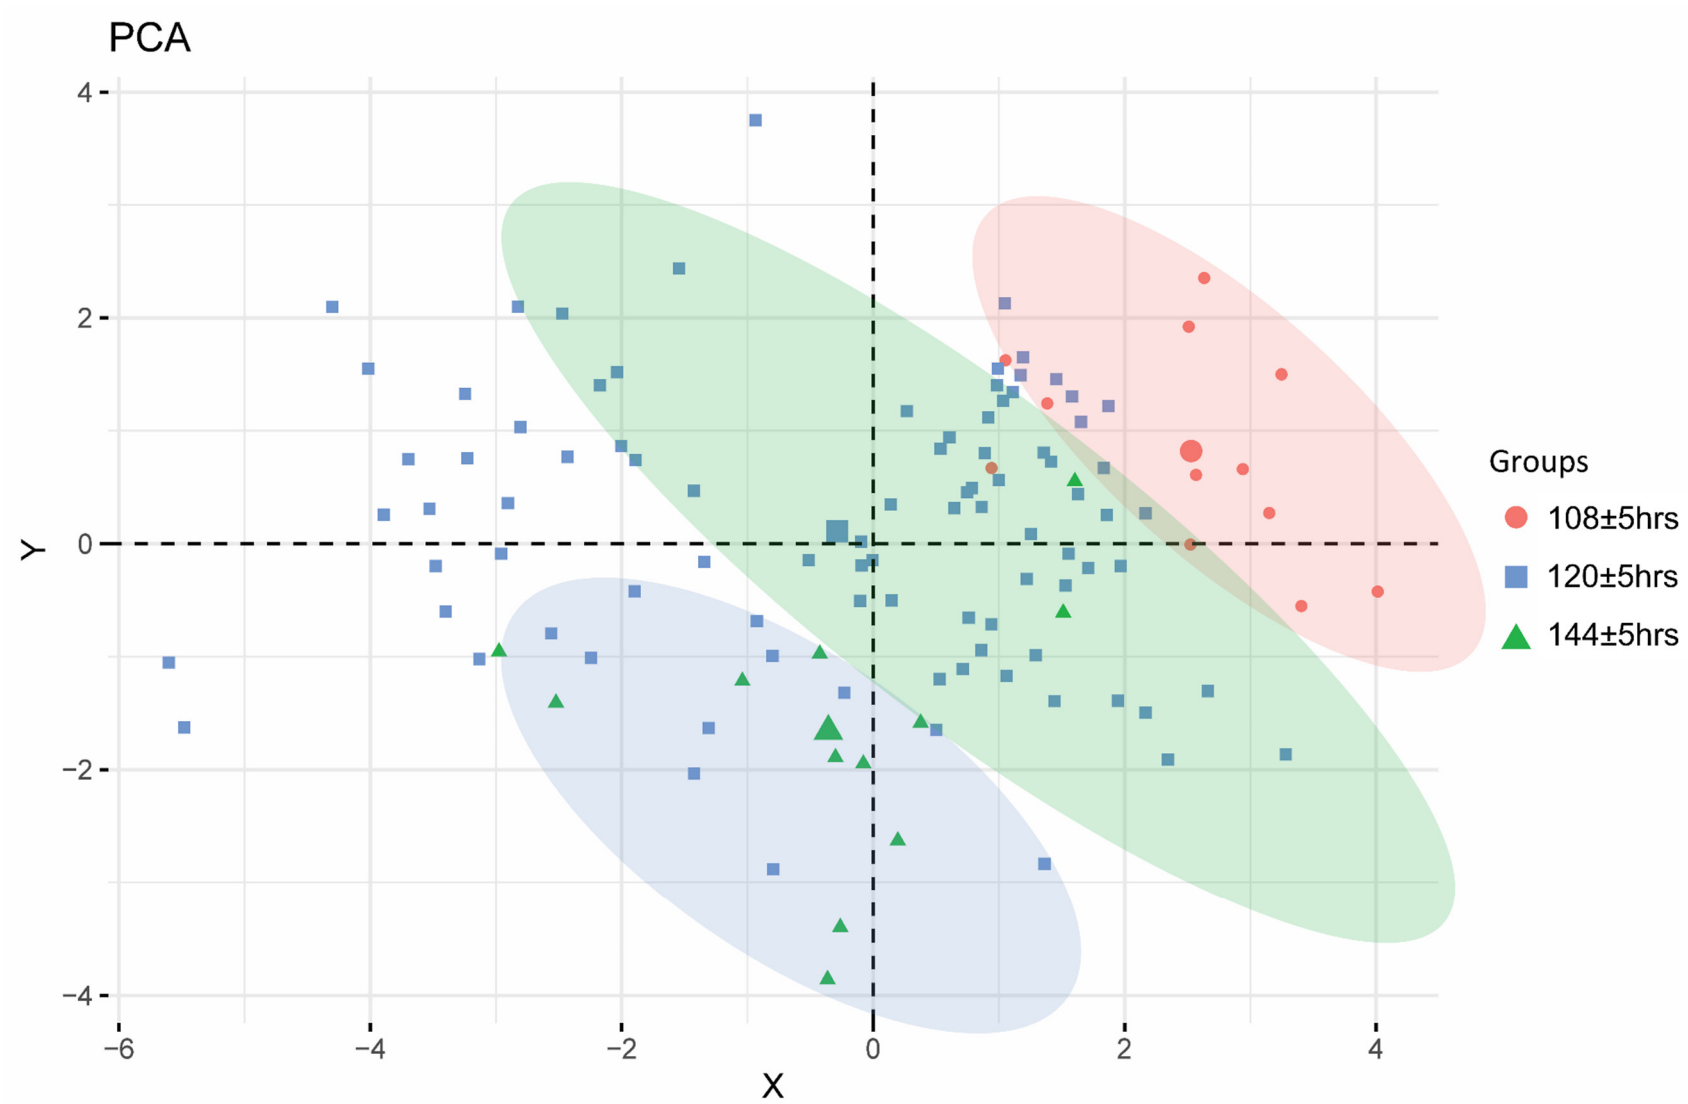

**Figure S3.** PCA-based cluster analysis based on the differentially expressed miRNA signatures.

Supplement: s1 [file s1]
